# Supplementary material for: Screening of FDA-Approved Drugs Using a 384-Well Plate-Based Biofilm Platform: The Case of Fingolimod
Source: MDPI journal article supplement (doi:10.3390/microorganisms8111834), 2020-11-21
Supplement: s1 [file s1]

**Supplementary table 1.** Compounds and results of the screening of the Screen-Well FDA Approved Drug Library Version 2 (ENZO Life Sciences) against *Staphylococcus aureus* ATCC 25923.

| Compound name                   | Average inhibition % <sup>1</sup> |           |           |         |               |           |           |         |
|---------------------------------|-----------------------------------|-----------|-----------|---------|---------------|-----------|-----------|---------|
|                                 | Pre-exposure                      |           |           |         | Post-exposure |           |           |         |
|                                 | Planktonic                        |           | Biofilm   |         | Planktonic    |           | Biofilm   |         |
|                                 | Turbidity                         | Viability | Viability | Biomass | Turbidity     | Viability | Viability | Biomass |
| Clindamycin·HCl                 | 98.8                              | 96.2      | 92.1      | 88.6    | 79.7          | 69.3      | 44.3      | 15.8    |
| Felbamate                       | 39.1                              | -13.6     | -48.4     | -37.6   | 33.8          | 24.1      | -10.5     | 32.6    |
| Cyclosporine A                  | 40.8                              | -26.5     | -36.2     | -56.6   | 35.0          | 19.0      | -10.0     | 6.9     |
| Donepezil·HCl                   | 50.1                              | -3.7      | -24.4     | 6.1     | 36.6          | 32.2      | 22.2      | 47.2    |
| Lincomycin·HCl monohydrate      | 99.4                              | 97.7      | 99.6      | 96.1    | 96.7          | 96.8      | 96.7      | 3.7     |
| Mycophenolic Acid               | 43.5                              | -49.2     | -40.6     | -32.6   | 41.4          | -22.9     | -0.5      | 39.5    |
| Sirolimus (Rapamycin)           | 34.7                              | -12.0     | 14.4      | -1.4    | 47.4          | 7.6       | 8.9       | 15.5    |
| Spectinomycin·2HCl Pentahydrate | 47.6                              | -34.2     | 3.8       | 11.8    | 50.5          | -23.2     | 9.3       | 24.9    |
| Amiodarone·HCl                  | 50.1                              | -30.7     | 28.5      | 42.3    | 44.1          | -5.3      | 4.1       | 35.4    |
| Nicardipine·HCl                 | 36.2                              | -52.8     | 2.2       | 8.8     | 40.6          | 1.5       | -20.3     | 28.8    |
| Pimozide                        | 40.7                              | -35.9     | -18.9     | 14.0    | 36.3          | -1.3      | 17.6      | 10.8    |
| Loperamide·HCl                  | 47.8                              | -44.7     | -28.7     | 0.5     | 39.4          | -23.4     | 9.7       | 43.0    |
| Tolbutamide                     | 34.9                              | -38.9     | -23.3     | 15.7    | 40.3          | 13.3      | -34.2     | 5.0     |
| Glipizide                       | 31.6                              | -60.4     | -16.2     | 10.0    | -4.9          | -24.2     | -1.3      | 21.6    |
| Phentolamine·HCl                | 41.6                              | -0.4      | -17.5     | -22.9   | 1.3           | 9.6       | -31.2     | -14.6   |
| Quinine·HCl·2H <sub>2</sub> O   | 43.0                              | -43.2     | -44.1     | -11.4   | 35.4          | 17.3      | 3.2       | 14.8    |
| Propafenone·HCl                 | 61.3                              | 18.5      | -42.9     | -20.4   | 59.1          | 19.2      | -14.4     | -17.9   |
| Phenytoin                       | 59.7                              | -51.6     | -52.2     | -20.6   | 52.3          | -0.3      | 16.8      | -17.2   |
| Procainamide·HCl                | 65.7                              | -6.0      | -44.4     | -3.7    | 58.0          | 28.7      | 15.0      | 3.7     |
| Lidocaine·HCl·H <sub>2</sub> O  | 59.6                              | -23.2     | -35.5     | -29.1   | 61.9          | 6.7       | -11.7     | -21.9   |
| Flecainide Acetate              | 57.2                              | -10.1     | -29.3     | -29.8   | 58.0          | 19.1      | 0.8       | -17.2   |
| Rosiglitazone                   | 53.3                              | -9.1      | -29.8     | 2.9     | 51.4          | -8.3      | 11.4      | 0.7     |
| Amantadine·HCl                  | 45.2                              | -12.9     | -13.6     | -0.3    | 63.8          | 25.4      | -9.7      | -19.4   |
| Prazosin·HCl                    | 52.9                              | -9.1      | -30.3     | 7.1     | 62.7          | 1.1       | -26.8     | 14.0    |
| Clonidine·HCl                   | 56.0                              | -14.3     | -32.4     | 3.3     | 52.7          | 17.4      | -33.7     | -0.7    |
| Guanabenz Acetate               | 55.3                              | -28.2     | -50.5     | -23.7   | 60.0          | -3.9      | -12.6     | -11.2   |
| Dihydroergotamine Mesylate      | 43.6                              | -33.5     | -41.8     | -5.9    | 36.4          | -2.3      | -1.4      | 6.0     |
| Emtricitabine                   | 32.8                              | -71.6     | -8.4      | -2.9    | 32.9          | -40.0     | -1.2      | 0.5     |
| Betaxolol·HCl                   | 26.8                              | -3.2      | 1.8       | 3.9     | 40.5          | 23.2      | -19.6     | -27.5   |
| Caffeine                        | 42.0                              | -37.7     | -23.6     | -7.1    | 51.0          | 1.2       | -7.5      | -11.8   |

|                                       |      |       |       |       |      |       |       |       |
|---------------------------------------|------|-------|-------|-------|------|-------|-------|-------|
| (S)-Timolol Maleate                   | 56.5 | 18.3  | -48.7 | -32.7 | 48.1 | 39.4  | -15.7 | -18.9 |
| Salbutamol Hemisulfate                | 57.7 | -23.6 | -34.2 | 3.0   | 53.9 | 17.5  | 7.9   | -3.0  |
| Pindolol                              | 66.5 | 11.7  | -33.9 | -17.2 | 52.9 | 25.4  | -5.8  | -22.6 |
| Dobutamine·HCl                        | 65.1 | 9.6   | -39.7 | -46.6 | 59.6 | 18.1  | 3.6   | 0.5   |
| Sotalol·HCl                           | 69.5 | 18.6  | -25.1 | -44.9 | 61.0 | 32.0  | -17.3 | -23.3 |
| Maprotiline·HCl                       | 59.6 | -3.0  | -12.3 | -18.8 | 61.0 | 21.7  | -15.3 | -15.3 |
| Pilocarpine·HCl                       | 44.4 | -9.3  | -8.4  | 24.3  | 53.4 | 37.7  | 9.4   | -2.9  |
| Ipratropium·Br                        | 56.5 | -5.8  | -25.4 | -3.7  | 55.6 | -0.3  | -4.4  | -3.1  |
| Tropicamide                           | 63.4 | 9.0   | -31.1 | -3.0  | 53.2 | 19.6  | -28.1 | -14.1 |
| Pancuronium·2Br                       | 64.3 | -10.7 | -37.5 | -56.7 | 51.1 | 16.2  | -53.2 | -31.7 |
| Ivermectin                            | 67.4 | 30.8  | -28.7 | -19.3 | 46.2 | 18.9  | -57.8 | -38.1 |
| Haloperidol                           | 28.8 | -71.7 | -10.8 | 4.9   | 35.4 | -15.7 | 6.6   | -6.2  |
| Cimetidine                            | 41.1 | 0.0   | 10.8  | 8.5   | 13.2 | 4.8   | -13.7 | 16.8  |
| Zonisamide                            | 45.4 | -29.8 | -27.3 | -15.7 | 46.9 | 2.4   | -0.2  | -8.1  |
| Zoledronic Acid Monohydrate           | 60.0 | 18.5  | -19.3 | -25.3 | 59.8 | 48.1  | -1.8  | -5.9  |
| Naltrexone·HCl                        | 55.0 | -6.2  | -21.5 | -30.8 | 54.5 | 19.7  | 21.2  | -12.9 |
| Zolmitriptan                          | 61.9 | 10.6  | -30.2 | -32.1 | 55.0 | 36.9  | 6.9   | -18.7 |
| Memantine·HCl                         | 58.0 | -14.2 | -21.6 | -29.0 | 58.0 | 13.7  | -4.4  | -23.5 |
| Riluzole·HCl                          | 59.4 | 7.2   | -16.3 | -45.7 | 59.2 | 31.5  | 1.6   | 3.5   |
| Propofol                              | 52.3 | -25.0 | -14.0 | -9.0  | 58.3 | 16.5  | 3.9   | -9.8  |
| Aminophylline                         | 52.3 | -1.2  | -6.9  | -2.8  | 57.8 | 29.2  | 6.2   | -8.5  |
| Nateglinide                           | 58.8 | -3.3  | -26.0 | -11.0 | 49.9 | 7.1   | -4.1  | 22.2  |
| (±) Isoproterenol·HCl                 | 57.9 | 1.8   | -19.2 | 3.3   | 55.2 | 31.3  | -14.1 | -17.5 |
| Acetylcholine Chloride                | 60.3 | -27.0 | -31.6 | -48.7 | 51.1 | 11.3  | -6.8  | -10.8 |
| Atropine Sulfate Monohydrate          | 53.8 | -7.6  | -20.7 | -23.3 | 46.1 | 23.5  | 8.5   | 23.8  |
| Apomorphine·HCl Hemihydrate           | 37.4 | -70.6 | 9.3   | 18.8  | 24.6 | -38.6 | 13.7  | 0.2   |
| Chlorpromazine·HCl                    | 15.0 | 6.6   | 39.8  | 28.8  | -1.3 | 12.0  | -4.4  | 8.2   |
| Fluphenazine·2HCl                     | 53.2 | -17.7 | -29.9 | -37.8 | 55.4 | 20.8  | -7.4  | -8.3  |
| Risperidone                           | 53.3 | 23.4  | -34.6 | -30.7 | 52.0 | 43.4  | -1.0  | 3.4   |
| Diphenhydramine·HCl                   | 65.6 | 0.6   | -19.3 | -20.8 | 58.5 | 16.7  | 22.7  | -30.6 |
| Promethazine·HCl                      | 48.8 | -4.2  | -10.4 | 11.0  | 47.8 | 34.5  | 29.1  | 7.6   |
| Ranitidine·HCl                        | 58.8 | -24.0 | -25.4 | -37.3 | 56.8 | 18.4  | -8.1  | -5.4  |
| L-(-)-Epinephrine-(+)-Bitartrate      | 63.0 | 18.2  | -18.7 | -39.6 | 42.3 | 9.8   | 12.0  | -9.1  |
| Norepinephrine Bitartrate Monohydrate | 51.2 | -22.7 | 3.8   | -26.6 | 50.9 | 12.7  | 21.5  | 2.5   |
| Quetiapine Fumarate                   | 63.7 | 8.8   | -23.6 | -4.7  | 53.8 | 32.8  | 24.0  | 19.0  |

|                                             |      |       |       |       |      |       |       |       |
|---------------------------------------------|------|-------|-------|-------|------|-------|-------|-------|
| Imipramine·HCl                              | 60.3 | -1.7  | -19.5 | 4.6   | 55.1 | 21.4  | 2.9   | 9.0   |
| Amoxapine                                   | 65.1 | 12.9  | -23.5 | 11.7  | 43.8 | 24.5  | -4.2  | 17.6  |
| Metoclopramide·HCl                          | 65.7 | -11.0 | -27.2 | -20.5 | 58.0 | 15.4  | 2.4   | -7.1  |
| Nalbuphine·HCl                              | 55.8 | -22.9 | -26.4 | -3.2  | 39.7 | 25.5  | -18.4 | -3.1  |
| Carbachol<br>(Carbamylcholine )<br>Chloride | 30.1 | -72.8 | -0.9  | -4.1  | 41.6 | -12.9 | -3.0  | -12.9 |
| Famotidine                                  | 27.3 | -11.0 | 9.7   | -4.0  | 33.5 | 27.4  | 12.0  | 10.5  |
| Isoniazid                                   | 46.8 | -19.6 | -7.4  | -18.7 | 43.1 | 30.1  | 8.3   | 0.6   |
| Ticlopidine·HCl                             | 56.4 | 13.9  | -32.1 | -50.3 | 62.6 | 43.6  | -1.2  | 0.5   |
| Clemastine Fumarate                         | 65.1 | -12.3 | -9.5  | -8.8  | 59.1 | 24.2  | -7.1  | -5.3  |
| Vardenafil                                  | 67.0 | 23.9  | -25.7 | -7.2  | 64.7 | 40.4  | 2.4   | -20.9 |
| Linezolid                                   | 98.1 | 96.1  | 87.4  | 79.2  | 93.4 | 95.6  | 87.8  | -15.5 |
| Docetaxel (Taxotere)                        | 67.4 | -7.1  | -20.3 | -43.6 | 58.1 | 10.1  | 19.3  | -9.5  |
| Olopatadine                                 | 57.5 | -9.0  | -7.9  | -7.3  | 58.8 | 29.1  | 15.6  | 9.0   |
| Tolcapone                                   | 69.4 | 35.9  | -11.2 | 6.2   | 78.0 | 55.1  | 15.3  | -2.6  |
| Olmesartan                                  | 60.7 | -6.2  | -4.6  | 2.8   | 56.5 | 9.8   | -1.9  | -6.6  |
| Nisoldipine                                 | 59.1 | 12.7  | -23.4 | 10.5  | 63.3 | 31.2  | 5.4   | -1.4  |
| Olanzapine                                  | 58.1 | -12.2 | -16.5 | -40.6 | 52.1 | 6.3   | 5.6   | 15.8  |
| Lovastatin                                  | 57.0 | 4.3   | -32.0 | -43.8 | 63.3 | 33.1  | 14.5  | 0.0   |
| Lamotrigine                                 | 35.3 | -68.4 | 7.9   | -29.0 | 30.6 | -13.5 | 18.1  | 2.8   |
| Azathioprine                                | 50.9 | -9.9  | -13.2 | -30.8 | 57.0 | 32.5  | 5.7   | 6.4   |
| Sildenafil Citrate                          | 43.1 | -1.4  | 30.9  | -3.2  | 14.0 | 14.1  | 7.0   | 17.7  |
| Atovaquone                                  | 41.1 | -37.2 | -19.4 | -30.4 | 46.4 | 16.3  | 15.4  | 20.5  |
| Sertaconazole                               | 96.1 | 95.1  | 75.3  | 78.1  | 80.1 | 55.2  | -31.9 | -7.5  |
| Cefepime·2HCl Hydrate                       | 96.0 | 96.5  | 98.6  | 86.6  | 96.2 | 97.7  | 97.4  | -24.1 |
| Aripiprazole                                | 58.7 | -55.7 | -15.7 | -49.7 | 52.9 | -4.6  | 10.5  | -0.6  |
| Candesartan                                 | 61.2 | 15.2  | 2.8   | -62.0 | 50.8 | 14.7  | 20.9  | -9.8  |
| Butenafine·HCl                              | 56.7 | -19.4 | -16.6 | -6.5  | 53.6 | 18.9  | 26.9  | -11.4 |
| Dorzolamide·HCl                             | 60.0 | 20.4  | -18.7 | -9.6  | 62.3 | 40.6  | 10.2  | -14.6 |
| Escitalopram                                | 62.1 | -9.0  | -9.4  | -1.9  | 50.7 | 9.7   | 6.0   | -0.3  |
| Eprosartan Mesylate                         | 58.6 | 14.8  | -14.7 | 5.1   | 51.8 | 27.2  | 1.5   | -1.3  |
| Entacapone                                  | 65.6 | -2.4  | -17.4 | -44.5 | 51.5 | 4.9   | 24.8  | 18.7  |
| Bleomycin Sulfate                           | 83.0 | 29.0  | 43.9  | 39.6  | 66.6 | 36.2  | 27.5  | 16.5  |
| Guanfacine·HCl                              | 62.4 | -27.1 | -14.3 | -5.0  | 43.9 | -15.9 | 26.7  | -5.3  |
| Tizanidine·HCl                              | 22.0 | -0.7  | 38.0  | 13.8  | 9.2  | 19.4  | 12.2  | 9.9   |
| Carvedilol                                  | 52.4 | -47.5 | -9.7  | -18.8 | 49.3 | 16.6  | 19.0  | 33.9  |
| Flumazenil                                  | 56.8 | 2.6   | -5.6  | -48.6 | 65.3 | 46.3  | 1.5   | 5.5   |
| Gefitinib                                   | 60.9 | -37.2 | -9.5  | -17.5 | 52.7 | 18.7  | 5.7   | 11.2  |
| Imatinib Mesylate                           | 59.7 | 0.0   | 7.5   | 8.7   | 59.1 | 32.8  | 12.3  | 2.8   |

|                                     |      |       |        |       |      |      |       |       |
|-------------------------------------|------|-------|--------|-------|------|------|-------|-------|
| Idarubicin·HCl                      | 99.1 | 96.5  | 74.4   | 67.7  | 90.0 | 92.3 | 66.3  | -13.4 |
| Montelukast·Na                      | 82.4 | 46.6  | 54.4   | 23.3  | 57.0 | 4.2  | -0.1  | -32.5 |
| Exemestane                          | 58.0 | -8.7  | -12.5  | -15.0 | 51.0 | -1.7 | 26.1  | 7.7   |
| Dinoprostone                        | 61.0 | 13.9  | 11.6   | -8.2  | 60.5 | 33.2 | 20.2  | -5.4  |
| Metformin·HCl                       | 57.5 | 2.2   | -9.0   | -21.0 | 51.4 | 14.8 | 6.3   | -7.1  |
| Anagrelide                          | 56.9 | 13.2  | 9.9    | 7.8   | 50.3 | 18.6 | 2.4   | 10.9  |
| Dofetilide                          | 49.1 | -23.5 | -16.0  | -38.2 | 58.4 | 24.2 | 16.0  | -0.5  |
| Erlotinib                           | 48.6 | -23.1 | 8.1    | 10.7  | 35.7 | 10.6 | 32.4  | 17.3  |
| Tacrine·HCl                         | 31.7 | -67.4 | -7.5   | -13.4 | 44.6 | -1.9 | 11.7  | 5.2   |
| Galantamine·HBr                     | 9.1  | -4.2  | 31.9   | -3.4  | 22.1 | 9.1  | 15.4  | -1.5  |
| Amiloride·HCl·2H <sub>2</sub> O     | 34.7 | -32.1 | -8.5   | -12.4 | 53.0 | 23.7 | 24.3  | 9.1   |
| Amlodipine                          | 55.5 | -2.0  | -21.2  | -24.1 | 54.6 | 39.2 | 29.1  | 26.1  |
| Diltiazem·HCl                       | 59.3 | -12.6 | -1.0   | -3.4  | 62.1 | 23.0 | 15.6  | 7.2   |
| Nifedipine                          | 55.4 | 6.1   | -26.0  | -9.6  | 49.9 | 25.0 | 17.2  | 5.8   |
| Nimodipine                          | 53.7 | -51.9 | -12.2  | -9.9  | 57.7 | 3.1  | 13.1  | -7.8  |
| Verapamil·HCl                       | 58.4 | -20.1 | -14.8  | -45.5 | 53.1 | 24.4 | 9.0   | -19.4 |
| Gabapentin                          | 38.5 | -34.3 | 16.5   | -26.4 | 49.6 | 10.6 | 33.3  | -9.9  |
| Felodipine                          | 62.5 | 17.5  | 3.3    | 0.5   | 51.1 | 31.5 | 22.3  | -0.7  |
| Phenoxybenzamine·HCl                | 55.0 | -3.7  | -24.4  | 12.3  | 56.6 | 11.2 | -1.8  | -6.6  |
| Trifluoperazine·HCl                 | 69.6 | 22.2  | 11.2   | 24.1  | 46.7 | 26.0 | 6.2   | 16.6  |
| Latanoprost                         | 49.6 | -26.6 | -24.8  | -43.2 | 49.1 | 10.3 | 24.7  | 15.9  |
| Alfuzosin                           | 52.5 | -7.3  | -15.4  | -32.6 | 42.9 | 17.5 | 32.5  | 22.0  |
| Bromocriptine Mesylate              | 40.6 | -67.5 | 4.9    | -9.8  | 30.5 | -8.3 | 29.0  | 28.6  |
| Clozapine                           | 24.1 | -2.4  | 38.0   | 4.7   | 11.2 | 20.0 | 10.5  | 14.5  |
| Acitretin                           | 49.6 | 39.3  | -109.3 | -49.9 | 54.9 | 41.4 | -28.4 | -22.9 |
| Calcitriol                          | 51.9 | 9.4   | 2.7    | -17.2 | 54.6 | 43.1 | 17.3  | 1.0   |
| Ketoconazole                        | 59.0 | -5.6  | -4.4   | -15.8 | 55.4 | 23.9 | 20.7  | 19.9  |
| Cromolyn·Na (Disodium Cromoglycate) | 54.9 | 3.4   | -4.7   | -4.3  | 56.2 | 37.4 | 17.5  | -11.1 |
| Capsaicin                           | 60.5 | -16.1 | -17.6  | -47.4 | 59.3 | 13.7 | 8.8   | -42.4 |
| Dexamethasone                       | 62.2 | 8.4   | 6.0    | -33.7 | 56.4 | 29.5 | 16.9  | -26.0 |
| Dipyridamole                        | 54.1 | -6.7  | -8.8   | -15.7 | 60.0 | 22.9 | 17.3  | -7.6  |
| Ethacrynic Acid                     | 56.5 | 1.4   | -7.7   | -7.5  | 51.0 | 17.5 | 13.8  | 15.4  |
| Indomethacin                        | 59.5 | 5.0   | -14.6  | -1.5  | 49.7 | 4.2  | 11.9  | 8.4   |
| Naproxen                            | 53.7 | 16.2  | -10.6  | 5.4   | 56.8 | 25.8 | 4.4   | -3.6  |
| Ibuprofen                           | 56.3 | -11.0 | -18.3  | -33.0 | 43.7 | -3.3 | 38.1  | 26.7  |
| Bumetanide                          | 52.4 | -4.0  | -20.3  | -12.5 | 43.6 | 15.2 | 37.2  | 4.2   |
| Neomycin trisulfate                 | 68.8 | 27.4  | 44.6   | 36.8  | 21.2 | 8.5  | 18.1  | 2.5   |
| Auranofin                           | 90.5 | 93.5  | 93.0   | 87.4  | 84.0 | 85.0 | 62.7  | 44.2  |
| Captopril                           | 44.2 | -29.0 | -16.9  | -21.3 | 48.1 | 9.4  | 17.4  | 14.8  |

|                             |      |       |       |       |      |      |       |       |
|-----------------------------|------|-------|-------|-------|------|------|-------|-------|
| Tranlycypromine Hemisulfate | 45.6 | 8.6   | -10.8 | -30.1 | 53.2 | 47.4 | 20.5  | -0.8  |
| Piroxicam                   | 49.4 | -13.9 | -2.7  | -30.2 | 59.7 | 37.4 | -0.4  | -52.8 |
| Moxifloxacin·HCl            | 98.3 | 97.2  | 97.9  | 92.5  | 96.1 | 98.0 | 91.4  | -2.2  |
| S(-)-Carbidopa monohydrate  | 65.7 | -1.9  | -1.4  | -32.1 | 51.2 | 18.5 | 17.6  | -38.6 |
| Ketoprofen                  | 55.3 | 19.0  | 6.7   | -47.6 | 55.1 | 29.3 | 20.7  | -38.6 |
| Meloxicam                   | 53.7 | -11.9 | 0.1   | -7.6  | 58.1 | 18.0 | 19.3  | -22.6 |
| Terbinafine·HCl             | 47.2 | -8.6  | -1.5  | -14.9 | 56.5 | 26.8 | 31.6  | -14.5 |
| Sodium Phenylbutyrate       | 60.7 | -13.5 | -13.3 | 1.1   | 48.2 | -1.0 | 10.7  | 8.1   |
| Simvastatin                 | 48.9 | 1.7   | -11.6 | -4.6  | 52.4 | 25.3 | 8.1   | -17.2 |
| Goserelin Acetate           | 57.4 | -5.1  | -16.7 | -37.1 | 49.9 | 10.6 | 26.9  | 12.1  |
| Raloxifene·HCl              | 40.7 | -9.5  | 24.7  | -21.5 | 38.1 | 22.0 | 39.7  | 36.0  |
| Rifampin (Rifampicin)       | 97.3 | 95.2  | 91.2  | 77.7  | 76.2 | 71.4 | 86.4  | 37.7  |
| Etoposide                   | 51.8 | -13.9 | 53.2  | 8.9   | 56.4 | 12.0 | 25.2  | 11.2  |
| Mitomycin C                 | 68.5 | 33.0  | -16.9 | -49.2 | 50.6 | 26.1 | 36.9  | 12.7  |
| Delavirdine Mesylate        | 44.9 | 13.8  | -12.7 | -33.8 | 52.8 | 42.6 | 20.0  | -4.9  |
| Daunorubicin·HCl            | 98.1 | 97.6  | 97.7  | 93.2  | 87.9 | 65.4 | 25.1  | -6.7  |
| Doxorubicin·HCl             | 68.3 | -27.2 | -28.1 | 23.5  | 73.9 | 47.4 | -11.2 | 6.0   |
| Cetirizine 2HCl             | 54.7 | -1.1  | 3.8   | -47.0 | 52.0 | 32.7 | 20.7  | -12.7 |
| Lapatinib Ditosylate        | 66.4 | 26.3  | -6.8  | -39.6 | 61.6 | 38.0 | -1.2  | -27.4 |
| Pioglitazone·HCl            | 49.7 | -11.7 | -18.6 | -33.0 | 52.2 | 10.3 | 7.8   | -7.5  |
| Rivastigmine Tartrate       | 53.2 | 7.5   | -9.7  | -35.4 | 58.5 | 30.6 | -2.8  | -16.6 |
| Ergotamine Tartrate         | 51.7 | -4.0  | -0.3  | -0.4  | 52.6 | 3.4  | 13.6  | 0.6   |
| Sulindac                    | 39.8 | -10.2 | -0.1  | -2.9  | 50.6 | 13.2 | 18.3  | -0.4  |
| Valproate·Na                | 56.2 | -9.7  | -15.7 | -27.5 | 53.1 | 11.9 | 26.8  | 22.3  |
| Calcipotriene               | 45.8 | -6.5  | -4.3  | -7.1  | 39.5 | 15.7 | 24.0  | 15.5  |
| Zafirlukast                 | 53.6 | -25.7 | 29.7  | -18.9 | 62.3 | 42.2 | 46.0  | -1.0  |
| Zileuton                    | 15.5 | 4.1   | 46.4  | 24.4  | 14.4 | 9.8  | 30.7  | 21.8  |
| Bortezomib                  | 40.4 | -13.9 | -12.4 | -42.5 | 41.9 | 2.6  | 39.9  | 0.3   |
| Diazoxide                   | 50.8 | 27.3  | -21.4 | -44.0 | 46.9 | 42.6 | 33.9  | 10.0  |
| Glyburide                   | 50.9 | -31.9 | -21.1 | 1.8   | 53.4 | 11.4 | 1.9   | -8.7  |
| Minoxidil                   | 55.1 | 1.9   | -3.1  | -13.2 | 56.4 | 31.7 | 30.5  | 33.1  |
| Tolazamide                  | 61.3 | -5.7  | -12.0 | -55.3 | 52.6 | 10.1 | 19.1  | -11.6 |
| Bexarotene                  | 87.0 | 70.7  | -29.1 | -58.2 | 54.8 | 48.7 | 8.1   | -5.8  |
| Tranexamic Acid             | 50.8 | -11.4 | -9.4  | -21.2 | 54.2 | 18.0 | 24.9  | 5.1   |
| Celecoxib                   | 55.0 | 18.3  | -11.2 | -26.5 | 66.9 | 50.3 | 4.1   | -25.0 |
| Levetiracetam               | 54.4 | -6.5  | 3.2   | 9.8   | 56.8 | 21.4 | 21.0  | -3.7  |
| Letrozole                   | 54.2 | 8.9   | 11.7  | 5.1   | 47.2 | 41.9 | 0.7   | -9.8  |
| Anastrozole                 | 55.5 | -0.7  | -9.9  | -27.9 | 54.3 | 29.6 | -15.9 | 3.3   |

|                                                           |      |       |       |       |      |      |       |       |
|-----------------------------------------------------------|------|-------|-------|-------|------|------|-------|-------|
| Bicalutamide                                              | 52.7 | -4.4  | -4.0  | -28.7 | 36.4 | 29.1 | 12.4  | 30.2  |
| Clindamycin Palmitate·HCl                                 | 99.0 | 94.6  | 85.7  | 88.0  | 84.5 | 79.9 | 61.0  | 12.8  |
| Vorinostat                                                | 17.9 | 1.1   | 30.1  | -11.3 | 33.8 | 18.7 | 21.5  | 2.1   |
| Didanosine                                                | 41.7 | -26.6 | -20.8 | -35.2 | 46.3 | 15.9 | 29.0  | 23.4  |
| Dolasetron                                                | 50.7 | 24.8  | -17.1 | -46.3 | 50.1 | 46.6 | 12.8  | 4.6   |
| Enalaprilat Maleate                                       | 47.8 | -25.7 | -3.3  | -7.8  | 52.8 | 31.8 | -33.8 | -3.0  |
| Fluvastatin·Na                                            | 53.4 | 24.1  | -5.2  | -9.6  | 58.8 | 58.5 | 2.5   | -12.7 |
| Fosinopril·Na                                             | 42.2 | -15.3 | -3.3  | -10.1 | 23.2 | -1.2 | -4.5  | -17.0 |
| Gemcitabine·HCl                                           | 98.6 | 98.3  | 88.8  | 83.8  | 92.7 | 92.9 | 85.2  | 32.3  |
| Granisetron·HCl                                           | 54.0 | -10.9 | -4.5  | -20.3 | 55.4 | 19.7 | 13.7  | -8.4  |
| Oxaliplatin                                               | 57.2 | 17.9  | 5.4   | -1.3  | 53.3 | 34.6 | 18.5  | 1.6   |
| Atazanavir                                                | 50.1 | -6.2  | 7.8   | -8.2  | 48.3 | 13.9 | 22.0  | -11.6 |
| Mycophenolate Mofetil                                     | 43.4 | -0.8  | 7.3   | 9.7   | 43.2 | 33.5 | 24.5  | 0.9   |
| Clofarabine                                               | 44.7 | -31.3 | 7.9   | -22.7 | 39.7 | 15.2 | -81.7 | -27.4 |
| Cabergoline                                               | 37.2 | -12.5 | 6.7   | 8.0   | 43.5 | 19.1 | 18.2  | 1.3   |
| Ibandronate·Na<br>Monohydrate                             | 62.9 | -21.9 | 39.8  | 20.1  | 32.6 | 33.5 | 34.4  | 14.5  |
| Imipenem                                                  | 40.2 | 1.4   | 55.2  | 7.7   | 52.2 | 27.9 | 17.4  | -17.2 |
| Lomustine                                                 | 48.5 | -12.9 | -24.4 | -9.0  | 58.4 | 35.7 | 9.3   | -3.5  |
| Adapalene                                                 | 41.8 | 23.6  | -5.1  | -29.8 | 51.9 | 56.8 | 15.5  | 3.5   |
| Meropenem                                                 | 4.0  | 6.5   | -7.9  | -23.4 | 59.3 | 37.7 | 18.8  | -28.9 |
| Oseltamivir Phosphate                                     | 48.8 | 17.6  | -13.2 | -27.7 | 50.1 | 41.6 | 28.3  | 3.2   |
| Pamidronate Disodium<br>Pentahydrate (Pamidronic<br>Acid) | 56.7 | -31.8 | -3.8  | -61.7 | 60.7 | 16.8 | -6.5  | -23.3 |
| Pramipexole<br>Dihydrochloride<br>Monohydrate             | 54.8 | 5.6   | -3.0  | -50.8 | 47.9 | 13.1 | 27.2  | 4.5   |
| Triptorelin Acetate                                       | 54.2 | -11.3 | -13.3 | -13.0 | 54.7 | 34.4 | -9.5  | -28.6 |
| Risedonic Acid                                            | 48.0 | 9.6   | -5.9  | -17.5 | 52.5 | 36.5 | 15.6  | -4.7  |
| Rocuronium Bromide                                        | 53.0 | 4.8   | -4.7  | -10.7 | 55.3 | 20.5 | 14.2  | -15.0 |
| Vinorelbine                                               | 51.9 | 13.6  | -5.4  | -9.1  | 44.0 | 45.0 | -19.5 | -8.9  |
| Salmeterol                                                | 60.0 | 6.0   | -26.8 | -64.5 | 43.1 | 15.1 | 11.8  | -4.1  |
| Vincristine Sulfate                                       | 49.4 | 0.1   | -8.4  | -21.7 | 42.9 | 24.9 | -4.4  | -13.1 |
| Aspirin (Acetylsalicylic<br>Acid)                         | 39.5 | -68.7 | -5.3  | -18.0 | 32.3 | 9.7  | -11.8 | 18.0  |
| Acyclovir<br>(Acycloguanosine)                            | 94.1 | 96.8  | 87.3  | 77.7  | 64.5 | 67.7 | 60.3  | 16.7  |
| Zidovudine (3'-Azido-3'-<br>Deoxythymidine)               | 33.8 | -20.4 | 6.8   | -13.8 | 41.0 | 9.5  | 21.6  | -10.3 |

|                                    |       |       |       |       |      |       |       |       |
|------------------------------------|-------|-------|-------|-------|------|-------|-------|-------|
| Allopurinol                        | 96.1  | 97.3  | 74.7  | 53.8  | 94.5 | 98.1  | 93.2  | -0.5  |
| Altretamine                        | 68.2  | -23.4 | 27.9  | 13.7  | 52.5 | 27.9  | 16.7  | 6.1   |
| Alendronate-Na Trihydrate          | 40.1  | 7.2   | -19.3 | -35.4 | 29.0 | 20.2  | 30.1  | 4.6   |
| Albendazole                        | 46.9  | -10.5 | -24.5 | -60.6 | 45.6 | 7.1   | 10.3  | 8.1   |
| Sumatriptan Succinate              | 51.6  | 18.0  | 12.9  | -43.4 | 47.9 | 33.5  | 25.6  | -28.6 |
| Amifostine                         | 32.8  | -29.0 | 8.7   | 1.8   | 49.9 | 20.2  | 17.5  | -8.7  |
| 4-Aminosalicylic Acid              | 54.2  | 11.9  | -7.2  | -27.2 | 28.0 | 46.5  | 25.8  | 5.0   |
| Mesalamine (5-Aminosalicylic Acid) | 42.7  | -10.7 | 2.3   | 2.0   | 43.7 | 10.7  | 30.9  | 17.0  |
| Ampicillin Trihydrate              | 45.3  | 10.5  | 18.6  | 14.4  | 52.0 | 32.4  | 12.7  | -18.3 |
| (±)-Atenolol                       | 44.2  | -30.0 | -3.1  | -33.5 | 47.4 | 27.3  | -9.2  | 2.7   |
| Atracurium Besylate                | 38.6  | -3.6  | -2.5  | -38.0 | 40.7 | 31.2  | -1.2  | -13.6 |
| Vinblastine Sulfate                | 43.9  | -38.8 | 9.0   | -26.0 | 34.5 | 0.0   | -20.1 | -4.2  |
| Azithromycin                       | 20.5  | -0.6  | 36.7  | -5.7  | 18.6 | 24.6  | 26.9  | -12.9 |
| Aztreonam                          | 37.3  | -28.0 | 3.3   | -24.3 | 43.2 | 11.9  | 31.1  | 14.9  |
| Betamethasone                      | 39.9  | 17.6  | -12.1 | -61.5 | 50.2 | 49.3  | 25.8  | -2.9  |
| Bisacodyl                          | 45.0  | -4.1  | -13.1 | -22.9 | 48.1 | 17.5  | 3.8   | -12.3 |
| Buspirone-HCl                      | 45.5  | 9.7   | -5.1  | -12.3 | 54.5 | 41.3  | 14.8  | -13.1 |
| Carboplatin                        | 64.5  | 10.7  | 7.6   | -34.4 | 53.4 | 25.7  | 28.3  | -19.5 |
| Carbamazepine                      | 50.6  | 22.4  | 15.2  | -41.0 | 44.8 | 25.8  | 27.4  | -16.5 |
| Cefotaxime Acid                    | 100.3 | 97.0  | 94.6  | 75.4  | 93.0 | 90.2  | 85.2  | 7.6   |
| Ceftazidime                        | 47.7  | -14.3 | -5.8  | 1.0   | 50.3 | 13.9  | 10.7  | -8.8  |
| Chloramphenicol                    | 85.8  | 27.8  | 36.1  | 16.1  | 76.2 | 61.1  | 14.1  | 8.7   |
| Chlorambucil                       | 47.2  | 8.8   | 1.1   | -3.5  | 52.0 | 40.1  | -10.2 | -17.4 |
| Chlorpheniramine Maleate           | 66.8  | 13.1  | 4.6   | -23.2 | 50.6 | 27.5  | 3.5   | -12.3 |
| Chloroquine Diphosphate            | 34.7  | -21.3 | 12.6  | 2.5   | 10.3 | 8.3   | 3.4   | 4.6   |
| Thalidomide                        | 52.3  | -29.7 | 10.6  | -22.0 | 10.8 | -17.4 | -22.0 | -16.8 |
| Ciprofloxacin                      | 93.9  | 95.6  | 95.1  | 80.5  | 55.3 | 62.7  | -11.5 | -22.6 |
| Citalopram-HBr                     | 39.2  | -41.0 | -4.0  | -19.2 | 39.4 | -1.5  | 10.7  | -18.1 |
| Clarithromycin                     | 30.1  | -19.4 | 4.4   | -37.9 | 50.9 | 46.0  | -17.3 | -46.4 |
| Clomiphene Citrate                 | 53.8  | -2.4  | -6.8  | -30.8 | 53.6 | 34.3  | 15.8  | -12.1 |
| Clopidogrel Bisulfate              | 46.7  | -0.5  | -6.8  | -33.2 | 51.7 | 45.9  | -15.9 | -12.2 |
| Clobetasol Propionate              | 50.4  | -1.5  | 1.1   | -36.0 | 43.4 | -7.7  | 29.9  | -18.2 |
| Orphenadrine Citrate               | 44.1  | 7.6   | 17.5  | -55.0 | 55.3 | 45.5  | -8.8  | -40.7 |
| Crotamiton                         | 26.4  | 15.7  | -9.9  | 3.3   | 33.8 | 8.2   | -6.8  | -1.7  |
| Cyclophosphamide monohydrate       | 40.2  | 16.9  | -24.4 | 20.7  | 21.6 | 8.1   | -2.9  | 7.3   |
| Cytarabine                         | 29.4  | 26.1  | -4.0  | 9.5   | 1.3  | 12.1  | 3.9   | 21.7  |
| Dacarbazine                        | 39.3  | -2.6  | -32.2 | -22.6 | 25.5 | -12.7 | 1.9   | 21.6  |
| Danazol                            | 16.8  | 13.8  | -13.7 | -9.3  | -3.8 | -1.2  | 21.8  | 21.4  |

|                                         |       |       |       |       |      |       |       |       |
|-----------------------------------------|-------|-------|-------|-------|------|-------|-------|-------|
| Desloratadine                           | 41.4  | -30.1 | -9.5  | -21.3 | 49.3 | 11.9  | -4.3  | -30.1 |
| Dextromethorphan                        | 37.8  | -4.4  | 13.2  | -29.8 | 51.9 | 31.7  | -8.4  | -38.4 |
| Diclofenac·Na Salt                      | 38.3  | -14.4 | -22.1 | -14.7 | 59.4 | 32.1  | -6.9  | -17.0 |
| Zalcitabine (2',3'-<br>Dideoxycytidine) | 38.8  | -3.6  | 21.2  | 5.1   | 47.0 | 35.7  | -1.8  | -37.8 |
| Diflunisal                              | 49.6  | -5.7  | -17.4 | -35.9 | 44.0 | 6.9   | 32.2  | -8.7  |
| Disulfiram                              | 25.4  | 29.4  | -24.1 | 7.1   | 35.7 | 6.8   | 8.6   | 27.5  |
| Doxazosin Mesylate                      | 26.2  | 5.4   | -26.4 | 20.6  | 13.7 | -6.5  | 25.3  | 38.9  |
| Doxycycline Monohydrate                 | 97.5  | 97.3  | 96.7  | 88.4  | 92.2 | 93.0  | 87.4  | 16.2  |
| Enalapril                               | 44.2  | -15.8 | -13.6 | 16.0  | 41.6 | 15.8  | -22.7 | 4.9   |
| Esomeprazole Potassium                  | 52.8  | 0.0   | -35.2 | -45.4 | 49.5 | 4.5   | 20.6  | -4.8  |
| Estradiol                               | 40.8  | -7.5  | 8.1   | -26.6 | 27.4 | 22.0  | 17.9  | -9.7  |
| Estrone                                 | 39.2  | -49.6 | -1.9  | -22.6 | 37.8 | 3.8   | 18.0  | -11.9 |
| Etidronate Disodium                     | 51.9  | 21.7  | -0.3  | -18.4 | 20.0 | 36.7  | -6.1  | -27.9 |
| Famciclovir                             | 29.9  | -24.3 | 1.8   | -19.5 | 55.2 | 6.6   | 22.7  | -11.6 |
| Fenoldopam Mesylate                     | 45.7  | 18.0  | -11.6 | -59.1 | 53.1 | 43.1  | -36.8 | -37.2 |
| Fenoprofen calcium salt<br>dihydrate    | 20.4  | 2.6   | -23.4 | 16.7  | 33.4 | 9.4   | 12.7  | 11.5  |
| Fenofibrate                             | 29.3  | 0.5   | -29.0 | -15.2 | 35.5 | -34.6 | 3.9   | 20.0  |
| Finasteride                             | 48.2  | 8.7   | -22.9 | 15.3  | 44.3 | 25.0  | 33.9  | 28.3  |
| Fluorouracil (5-<br>Fluorouracil)       | 99.4  | 96.4  | 97.4  | 94.1  | 94.9 | 91.8  | 95.1  | 20.3  |
| Flurbiprofen                            | 56.5  | -3.6  | -23.4 | -1.3  | 59.2 | 40.5  | 12.6  | 15.6  |
| Amitriptyline·HCl                       | 97.2  | 96.6  | 95.4  | 89.8  | 72.5 | 68.7  | 30.2  | -35.0 |
| Floxuridine                             | 99.2  | 98.4  | 97.6  | 90.7  | 96.2 | 94.4  | 88.3  | -13.2 |
| Fluocinolone Acetonide                  | 52.5  | -7.7  | 16.4  | -44.9 | 46.3 | 8.0   | 17.4  | -41.6 |
| Flutamide                               | 64.8  | 38.6  | -1.3  | -60.6 | 48.2 | 36.4  | 35.0  | -7.9  |
| Fluconazole                             | 42.5  | -26.0 | -2.1  | -23.3 | 54.9 | 22.5  | 11.2  | -30.4 |
| Furosemide                              | 31.4  | 2.3   | -19.0 | -13.9 | 48.6 | -0.3  | 4.0   | 10.0  |
| Ganciclovir                             | 25.2  | -7.7  | -19.4 | 30.5  | 38.0 | -17.7 | 38.4  | 44.3  |
| Gatifloxacin                            | 100.3 | 97.6  | 99.8  | 99.2  | 95.4 | 91.1  | 80.2  | 21.6  |
| Gentamycin Sulfate                      | 26.2  | -20.4 | 9.6   | 13.6  | 42.7 | -5.3  | 37.2  | 29.4  |
| Gemfibrozil                             | 51.7  | -12.3 | -19.3 | -28.5 | 56.5 | 26.4  | -1.6  | -27.4 |
| Glimepiride                             | 46.0  | 15.3  | -4.8  | -14.7 | 47.2 | 39.8  | 3.6   | -44.5 |
| Hydrocortisone                          | 28.2  | -42.2 | 20.2  | 10.3  | 50.0 | 29.3  | 0.6   | -19.4 |
| Hydrocortisone Acetate                  | 49.0  | 13.3  | -5.1  | 1.9   | 55.2 | 40.4  | 13.0  | 10.5  |
| Idoxuridine                             | 52.3  | -15.9 | 11.5  | -8.6  | 43.6 | 19.1  | 9.8   | 3.4   |
| Ifosfamide                              | 24.4  | 3.0   | 23.1  | -15.0 | 43.5 | 33.0  | 18.0  | 8.7   |
| Imiquimod                               | 22.2  | -1.0  | -19.2 | 20.1  | 30.7 | 3.2   | 42.9  | 50.3  |
| Indapamide                              | 17.7  | -42.7 | -13.0 | 15.7  | 28.7 | -27.7 | 34.7  | 32.9  |



|                                      |       |       |       |       |       |       |       |       |
|--------------------------------------|-------|-------|-------|-------|-------|-------|-------|-------|
| Itraconazole                         | 44.5  | -0.5  | -3.4  | 7.6   | 52.6  | 14.0  | 38.5  | 15.4  |
| Levonorgestrel                       | 47.9  | -24.1 | -13.1 | -19.1 | 59.2  | -10.1 | 19.7  | 18.2  |
| Levofloxacin·HCl                     | 99.8  | 97.9  | 93.0  | 85.9  | 95.8  | 97.5  | 86.8  | 24.7  |
| Leflunomide                          | 39.2  | -61.8 | 27.2  | 15.3  | 7.7   | 12.9  | 15.8  | -6.9  |
| Lisinopril·2H <sub>2</sub> O         | 7.8   | 8.9   | 32.5  | 8.6   | 8.4   | 39.2  | 1.7   | -17.3 |
| Loratadine                           | 23.1  | -30.5 | 15.0  | -27.6 | 33.7  | 7.9   | 36.1  | -1.7  |
| Losartan Potassium                   | 36.0  | 5.1   | 0.9   | -30.4 | 35.5  | 38.1  | -14.2 | -11.6 |
| Mebendazole                          | 59.9  | -44.5 | -3.5  | -32.4 | 49.2  | 7.1   | 32.7  | -4.0  |
| Medroxyprogesterone<br>Acetate       | 13.0  | -28.5 | -21.7 | 23.6  | 29.3  | -22.8 | 28.5  | 23.2  |
| Mefenamic Acid                       | 13.3  | -45.4 | -38.4 | 1.2   | 34.5  | -25.1 | 14.0  | 10.7  |
| Melphalan                            | 46.3  | -14.5 | -7.1  | -17.8 | 48.7  | 13.3  | 26.1  | 41.7  |
| L-A-Methyl-Dopa<br>Sesquihydrate     | 31.1  | -42.8 | -10.7 | -0.6  | 46.3  | -10.2 | 10.0  | 13.5  |
| Methylprednisolone                   | 54.3  | 2.1   | -9.4  | -6.6  | 54.3  | 19.5  | 23.3  | 33.8  |
| Metoprolol Tartrate                  | 46.2  | -10.3 | -1.1  | -36.0 | 81.9  | 78.0  | 47.7  | -14.1 |
| Methimazole                          | 49.7  | -13.4 | -2.4  | -49.3 | 41.9  | 1.7   | 32.9  | -15.9 |
| Metronidazole                        | 45.4  | 8.3   | -15.2 | -37.0 | 44.8  | 22.5  | 32.2  | -22.2 |
| Minocycline                          | 97.2  | 94.4  | 93.9  | 83.5  | 92.7  | 94.9  | 94.6  | -4.6  |
| Mitoxantrone·2HCl                    | 39.6  | -22.3 | -8.3  | -18.8 | 55.3  | 13.5  | 16.0  | -29.0 |
| Paclitaxel (Taxol)                   | 9.9   | -22.3 | -21.6 | 7.1   | 12.2  | -23.8 | 32.0  | 37.9  |
| Nabumetone                           | -9.9  | -29.1 | -22.9 | -12.8 | 27.4  | -37.0 | 8.4   | -5.8  |
| Naphazoline·HCl                      | 31.9  | -31.2 | -19.1 | -15.6 | 28.3  | -14.1 | 44.2  | 33.6  |
| Nefazodone·HCl                       | 24.1  | -55.3 | -0.3  | 12.8  | -26.8 | -52.2 | 34.3  | 13.7  |
| Norethindrone                        | 35.3  | -11.9 | -10.7 | -10.3 | 37.4  | 3.5   | 18.9  | 34.3  |
| Norfloxacin                          | 98.2  | 94.7  | 88.8  | 86.4  | 93.4  | 86.4  | 46.9  | -10.0 |
| Nystatin                             | 46.2  | -23.5 | -1.8  | 4.1   | 45.5  | 17.5  | 12.7  | -10.2 |
| Ofloxacin                            | 94.9  | 95.8  | 94.3  | 88.0  | 92.5  | 81.4  | 70.1  | 20.5  |
| Omeprazole                           | 35.7  | -28.4 | -7.6  | -33.7 | 39.4  | 17.7  | 24.3  | -4.2  |
| Oxcarbazepine                        | 57.2  | -56.1 | -2.1  | -50.9 | -10.7 | -15.5 | -26.5 | -9.3  |
| Oxiconazole Nitrate                  | 100.1 | 95.6  | 97.3  | 97.2  | 66.8  | -18.5 | 11.8  | 8.9   |
| Oxacillin sodium salt<br>monohydrate | 99.0  | 97.4  | 86.3  | 86.0  | 91.6  | 71.5  | 63.0  | 35.4  |
| Pantoprazole                         | 49.8  | -23.5 | -7.7  | 1.8   | 58.5  | -7.3  | 12.1  | -2.1  |
| Paroxetine·HCl                       | 45.3  | -26.2 | 11.1  | 17.0  | 47.4  | 8.2   | 43.0  | 19.6  |
| Penciclovir                          | 50.9  | -17.2 | -5.0  | -8.0  | 44.1  | -19.8 | 36.6  | 40.6  |
| Pentoxifylline                       | 21.4  | -1.9  | -2.0  | 31.5  | 41.5  | 23.7  | 6.4   | 14.8  |
| Penicillin V Potassium               | 98.7  | 97.7  | 98.0  | 91.3  | 84.3  | 76.2  | 80.0  | 31.6  |
| Piperacillin                         | 95.0  | 94.7  | 71.0  | 71.0  | 67.6  | 80.0  | 51.4  | 27.2  |
| Prednisolone                         | 44.7  | -7.9  | -20.1 | -4.0  | 42.5  | -13.1 | 21.4  | 22.6  |

|                           |      |       |       |       |      |       |      |       |
|---------------------------|------|-------|-------|-------|------|-------|------|-------|
| Progesterone              | 48.5 | -22.8 | -11.3 | -9.0  | 48.9 | 9.2   | 29.5 | 40.7  |
| Procarbazine·HCl          | 55.7 | -27.7 | -6.6  | -30.5 | 64.1 | 24.2  | 6.6  | -12.0 |
| Prednisone                | 42.1 | -32.5 | 13.3  | 13.3  | 46.5 | 9.2   | 51.2 | 28.7  |
| Primaquine diphosphate    | 81.2 | 21.2  | 37.7  | 39.9  | 73.5 | 26.7  | 26.6 | 36.2  |
| Praziquantel              | 51.9 | -29.1 | -11.4 | -19.6 | 42.8 | -2.5  | 15.2 | 34.2  |
| Quinapril·HCl             | 31.0 | -47.0 | 2.2   | 11.8  | 22.6 | -17.3 | 25.6 | 23.9  |
| Ranolazine·2HCl           | 56.3 | -2.3  | -14.4 | -5.1  | 75.9 | 54.4  | 8.3  | -3.0  |
| Ramipril                  | 47.9 | -22.9 | 1.1   | -19.3 | 45.0 | 16.3  | 33.5 | 31.6  |
| Ribavirin                 | 54.5 | 17.9  | -15.5 | -42.0 | 61.1 | 33.5  | 20.5 | 11.3  |
| Nelfinavir Mesylate       | -1.5 | 44.4  | 37.7  | 39.5  | 25.7 | 9.8   | 7.2  | -3.2  |
| Rimantadine·HCl           | 51.7 | 8.5   | -16.0 | -20.0 | 50.1 | 30.6  | 7.8  | 5.2   |
| Propranolol·HCl           | 43.4 | 5.8   | -4.2  | 15.6  | 49.6 | 21.9  | 25.7 | 27.0  |
| Scopolamine·HBr           | 45.5 | 6.8   | 7.4   | -34.8 | 62.8 | 35.1  | 21.2 | -2.5  |
| Spironolactone            | 40.4 | -4.7  | 6.3   | 27.0  | 41.6 | 5.3   | 42.0 | 32.3  |
| Streptomycin Sulfate      | 50.7 | -2.3  | 0.5   | 29.8  | 52.2 | -1.5  | 29.0 | 21.2  |
| Sulfadiazine              | 37.3 | -19.4 | -3.1  | -4.8  | 34.0 | 7.3   | 34.1 | 32.0  |
| Sulfasalazine             | 45.3 | -3.7  | -14.6 | 5.0   | 61.8 | 48.7  | 17.7 | 7.3   |
| Tamsulosin·HCl            | 51.0 | -21.5 | -14.4 | -25.5 | 49.1 | 5.8   | 33.2 | -15.0 |
| Telmisartan               | 42.8 | 13.1  | -22.5 | -23.1 | 49.5 | 29.7  | 22.9 | 21.8  |
| Terazosin·HCl             | 52.4 | -3.5  | -21.8 | -9.4  | 47.4 | -3.0  | 15.0 | 6.6   |
| Tetracycline              | 51.5 | -14.5 | -9.9  | -5.9  | 45.2 | 8.5   | 25.9 | 27.6  |
| Temozolomide              | 57.8 | -7.0  | -4.4  | -69.1 | 59.1 | 16.9  | 18.4 | -21.3 |
| Tinidazole                | 47.3 | -35.0 | 2.2   | 5.2   | 45.9 | -2.9  | 50.5 | 32.6  |
| Tobramycin                | 98.5 | 96.2  | 94.7  | 92.8  | 95.7 | 96.5  | 98.6 | 28.7  |
| Topotecan·HCl             | 46.5 | -38.1 | -24.8 | -17.0 | 55.3 | -5.4  | 31.4 | 26.9  |
| Toremifene Base           | 90.9 | 33.2  | 46.6  | 66.7  | 34.8 | -36.2 | 37.8 | 32.2  |
| Tolmetin sodium dihydrate | 53.7 | 1.9   | -21.2 | 0.1   | 64.2 | 35.0  | 8.2  | -27.4 |
| Amoxicillin               | 36.9 | -49.8 | 7.1   | 27.6  | 49.5 | -3.6  | 42.4 | 26.7  |
| Tramadol·HCl              | 56.4 | 1.9   | -10.3 | -54.9 | 67.1 | 34.5  | 11.8 | -32.1 |
| Trimethoprim              | 94.6 | 95.5  | 87.8  | 86.8  | 41.4 | 59.7  | 38.6 | 30.6  |
| Valacyclovir·HCl          | 50.7 | 15.7  | -13.8 | -31.5 | 41.7 | 14.3  | 34.2 | 10.2  |
| Vecuronium Bromide        | 54.5 | 14.5  | 0.4   | 2.6   | 51.3 | 33.2  | 27.3 | 30.8  |
| Venlafaxine·HCl           | 48.2 | -0.8  | 3.9   | -22.7 | 56.2 | 18.8  | 6.4  | -7.5  |
| Bupivacaine·HCl           | 48.7 | -5.3  | 1.9   | 0.0   | 39.0 | 5.0   | 41.6 | 56.2  |
| Ketotifen Fumarate        | 46.7 | 7.2   | 0.7   | -3.8  | 36.9 | 6.3   | 32.3 | 52.5  |
| Naloxone·HCl              | 42.5 | -6.3  | -0.4  | -4.7  | 29.7 | 8.4   | 26.9 | 25.3  |
| Fluoxetine·HCl            | 43.9 | -18.8 | 7.6   | 18.7  | 57.9 | 11.8  | 34.4 | 25.7  |
| Ondansetron               | 51.2 | -22.4 | -13.7 | -13.3 | 47.3 | -10.2 | 26.2 | 32.7  |
| Tiotropium Bromide        | 42.0 | -7.6  | -4.1  | -10.1 | 44.5 | 17.4  | 52.1 | 38.5  |

|                                                 |      |       |       |       |      |       |       |       |
|-------------------------------------------------|------|-------|-------|-------|------|-------|-------|-------|
| Thioridazine·HCl                                | 60.1 | -5.5  | -2.5  | -27.5 | 32.7 | -19.6 | 24.7  | -4.3  |
| Amrinone                                        | 47.2 | -0.9  | -3.1  | -7.9  | 54.0 | 25.5  | 14.7  | 2.9   |
| Milrinone                                       | 51.9 | -10.3 | -11.5 | -41.8 | 64.4 | 13.8  | 5.7   | -27.7 |
| Alprostadil                                     | 37.4 | -19.3 | 12.3  | -13.3 | 48.3 | -5.9  | 48.5  | 23.7  |
| Misoprostol                                     | 45.3 | -49.0 | 3.5   | -5.1  | 43.1 | -40.3 | 45.1  | 39.2  |
| Argatroban                                      | 51.1 | -27.6 | 3.4   | -14.4 | 28.0 | -12.3 | 36.4  | 33.4  |
| Cilastatin·Na                                   | 28.2 | -60.3 | -3.2  | 18.2  | 4.6  | -29.9 | 27.9  | 24.2  |
| Butoconazole Nitrate                            | 68.6 | 15.3  | -4.0  | -2.6  | 54.9 | 10.3  | 16.7  | 52.7  |
| Mifepristone                                    | 47.8 | -33.7 | -16.1 | -17.9 | 28.8 | -25.2 | 29.1  | 35.6  |
| Megestrol Acetate                               | 47.0 | -7.5  | -14.2 | -17.5 | 51.4 | 25.6  | 23.5  | 36.5  |
| Tamoxifen Citrate                               | 77.7 | 38.3  | 45.8  | 43.0  | 1.2  | 13.6  | 39.9  | 26.7  |
| Aprepitant                                      | 58.7 | 2.7   | -2.8  | -32.7 | 51.5 | 3.3   | 35.5  | 27.2  |
| Bosentan                                        | 38.3 | -1.1  | 4.7   | -13.0 | 55.1 | 23.0  | 43.2  | 22.9  |
| Efavirenz                                       | 54.2 | 4.9   | -1.9  | -61.8 | 62.3 | 34.1  | 25.5  | 25.1  |
| Miglustat (N-<br>Butyldeoxynojirimycin·HCl<br>) | 32.3 | -12.3 | -1.7  | -3.3  | 49.4 | 14.3  | 57.8  | 39.8  |
| Fulvestrant                                     | 34.3 | -15.9 | 6.5   | 2.4   | 51.3 | 11.6  | 29.2  | 30.3  |
| Esmolol                                         | 41.7 | -15.1 | -9.6  | 7.8   | 35.7 | 6.7   | 24.3  | 29.4  |
| Capecitabine                                    | 67.7 | 32.2  | 6.4   | 13.5  | 63.2 | 29.6  | 33.7  | 28.3  |
| Succinylcholine<br>Chloride·2H <sub>2</sub> O   | 29.8 | -63.4 | 1.2   | 28.4  | -3.2 | 2.9   | 23.2  | 40.3  |
| Cyproheptadine·HCl<br>Sesquihydrate             | 43.9 | -6.4  | -15.0 | -20.4 | 42.3 | 18.8  | 4.9   | 22.0  |
| Abacavir Sulfate                                | 43.1 | -13.5 | -0.4  | -37.6 | 43.5 | -6.6  | 39.3  | 28.7  |
| Acamprosate calcium                             | 20.7 | 20.6  | 18.5  | 21.4  | -3.0 | 26.4  | 23.0  | 32.5  |
| Acarbose                                        | 39.4 | -3.9  | 9.3   | -16.7 | 36.8 | -27.6 | 29.6  | 13.3  |
| Acebutolol·HCl                                  | 26.8 | 14.0  | 11.0  | 10.3  | 7.9  | 11.0  | 52.6  | 41.0  |
| Acetaminophen                                   | 32.8 | -7.9  | -6.7  | -46.1 | 36.5 | -19.9 | 35.0  | 9.0   |
| Acetazolamide                                   | 51.9 | 15.5  | 0.4   | -41.4 | 57.0 | 31.7  | 20.0  | 14.6  |
| Acetohexamide                                   | 43.2 | -6.2  | 4.6   | -10.7 | 60.1 | 31.6  | 35.5  | 15.5  |
| Acetohydroxamic Acid                            | 46.6 | 11.9  | 5.8   | -1.2  | 49.7 | 27.0  | 42.4  | 13.4  |
| Acetylcysteine                                  | 52.3 | -15.6 | 15.1  | -42.6 | 47.0 | 9.1   | 32.9  | -3.1  |
| Acrivastine                                     | 19.2 | -6.9  | 19.3  | 26.4  | 2.9  | -1.5  | 31.7  | 41.4  |
| Adefovir Dipivoxil                              | 41.2 | -16.6 | -1.7  | -5.6  | 60.6 | 31.7  | 32.9  | 30.5  |
| Adenosine                                       | 52.4 | 14.2  | -4.7  | -50.5 | 51.7 | 23.0  | 32.5  | 24.4  |
| Alitreteinoin                                   | 64.6 | 56.1  | -22.4 | -51.4 | 56.5 | 35.2  | 25.8  | 1.3   |
| Almotriptan malate                              | 45.9 | -16.7 | 5.9   | 7.4   | 54.4 | 22.5  | 31.2  | 18.9  |
| Alosetron·HCl                                   | 51.9 | 15.5  | 0.4   | -41.4 | 57.0 | 31.7  | 20.0  | 14.6  |
| Ambrisentan                                     | 55.0 | 25.1  | 5.8   | -20.6 | 43.5 | 47.1  | -29.0 | -16.9 |

|                                |      |       |       |       |      |       |       |       |
|--------------------------------|------|-------|-------|-------|------|-------|-------|-------|
| Amcinonide                     | 51.3 | -5.4  | 10.1  | 3.4   | 51.6 | 12.4  | 33.3  | -1.4  |
| Amikacin Disulfate             | 98.8 | 98.6  | 97.1  | 91.4  | 14.5 | 8.8   | -13.3 | -12.4 |
| Aminocaproic Acid              | 45.3 | -22.1 | 1.4   | -38.1 | 51.2 | 3.0   | 30.4  | 9.0   |
| Aminohippurate·Na              | 50.6 | -3.8  | 0.5   | -10.9 | 62.3 | 48.1  | 18.3  | 19.6  |
| Aminolevulinic Acid·HCl        | 48.1 | -14.8 | 12.7  | -33.4 | 57.5 | 17.8  | 18.0  | -22.5 |
| Amlexanox                      | 45.3 | 2.2   | -8.0  | -36.0 | 66.6 | 42.9  | 32.5  | 21.5  |
| Amphotericin B                 | 43.3 | -15.4 | 16.3  | -27.2 | 58.4 | 17.5  | 28.7  | -4.3  |
| Arsenic Trioxide               | 53.8 | 14.3  | 12.7  | -7.6  | 63.8 | 44.8  | 49.0  | 30.9  |
| Artemether                     | 27.2 | -25.3 | -11.2 | -34.2 | 4.8  | -12.3 | 30.0  | 7.7   |
| Articaine·HCl                  | 46.6 | 11.9  | 5.8   | -1.2  | 49.7 | 27.0  | 42.4  | 13.4  |
| L-Ascorbic Acid                | 52.3 | -15.6 | 15.1  | -42.6 | 47.0 | 9.1   | 32.9  | -3.1  |
| Asenapine Maleate              | 44.0 | 4.1   | 14.9  | -11.5 | 43.0 | 36.1  | 24.1  | 20.8  |
| Atomoxetine·HCl                | 49.2 | -32.7 | 12.8  | 15.8  | 47.3 | -1.3  | 55.2  | 48.1  |
| Atorvastatin Calcium           | 48.4 | -6.8  | 1.1   | -26.3 | 57.5 | 25.6  | 22.6  | -16.2 |
| Azacitidine                    | 37.5 | -20.6 | 25.0  | 22.7  | 43.5 | 2.0   | 42.1  | 32.7  |
| Azelaic Acid                   | 45.8 | 8.5   | 5.2   | -28.4 | 66.8 | 40.1  | 12.3  | -4.4  |
| Azelastine·HCl                 | 40.2 | -18.7 | 24.6  | 5.1   | 47.1 | -1.5  | 51.0  | 36.4  |
| Bacitracin                     | 64.6 | 13.8  | 19.3  | -30.6 | 59.4 | 27.6  | 19.0  | 4.1   |
| Baclofen                       | 37.1 | -16.8 | 23.5  | -0.2  | 41.5 | 12.2  | 52.8  | 31.3  |
| Balsalazide                    | 55.7 | 12.4  | 9.4   | -74.4 | 54.6 | 23.3  | 40.0  | 10.2  |
| Beclomethasone<br>Dipropionate | 35.9 | -27.4 | 19.0  | 10.3  | 42.4 | -10.2 | 50.5  | 28.9  |
| Benazepril·HCl                 | 46.0 | -2.8  | 5.2   | -40.5 | 51.4 | 10.1  | 25.7  | 18.8  |
| Bendamustine·HCl               | 43.3 | -27.8 | 6.6   | -6.1  | 43.9 | -24.5 | 43.2  | 48.2  |
| Bendroflumethiazide            | 43.3 | -9.1  | 5.6   | -2.4  | 40.5 | 7.4   | 54.0  | 31.3  |
| Benztropine Mesylate           | 39.5 | -43.7 | 17.6  | 12.2  | 53.2 | -3.1  | 36.6  | 5.6   |
| Betaine                        | 42.2 | -8.4  | 13.4  | 1.7   | 42.4 | 22.8  | 46.9  | 33.2  |
| Bethanechol Chloride           | 36.3 | -44.5 | 5.8   | -12.1 | 53.7 | -2.5  | 31.7  | 31.2  |
| Bimatoprost                    | 48.3 | -7.2  | 20.6  | -15.7 | 41.9 | 16.9  | 47.1  | 40.4  |
| Biperiden·HCl                  | 49.9 | -8.0  | 14.2  | 13.7  | 53.9 | 10.7  | 33.1  | 31.1  |
| Bisoprolol Fumarate            | 39.9 | -0.3  | 16.5  | 3.0   | 41.8 | 14.2  | 58.8  | 28.8  |
| Brimonidine                    | 39.1 | -23.0 | 10.0  | -11.0 | 41.9 | 0.6   | 35.5  | 12.7  |
| Bromfenac                      | 49.0 | 7.6   | 7.4   | -17.6 | 41.5 | 2.0   | 50.5  | 34.4  |
| Brompheniramine Maleate        | 39.4 | -42.8 | -3.5  | -0.8  | 45.9 | 7.3   | 21.1  | 14.3  |
| Budesonide                     | 46.1 | 0.6   | 2.2   | 11.6  | 45.1 | 5.2   | 36.9  | 35.5  |
| Bupropion                      | 21.9 | -28.8 | -1.6  | -15.4 | 32.2 | -1.9  | 24.9  | 12.4  |
| Busulfan                       | 30.4 | -11.9 | 0.3   | 23.3  | 34.7 | 15.1  | 53.4  | 46.7  |
| Capreomycin Disulfate          | 23.0 | -10.4 | 8.7   | 16.4  | 15.1 | -2.6  | 30.7  | 15.8  |
| Carbinoxamine Maleate          | 46.1 | -39.2 | 11.6  | 17.4  | 43.8 | -12.5 | 23.6  | 18.6  |
| Carglumic Acid                 | 50.4 | 11.9  | 11.5  | -13.3 | 44.5 | 15.7  | 38.4  | 32.4  |

|                                                       |       |       |      |       |       |       |      |       |
|-------------------------------------------------------|-------|-------|------|-------|-------|-------|------|-------|
| Carmustine                                            | 26.6  | 5.0   | 15.5 | 0.4   | 43.2  | 2.7   | 38.2 | 31.8  |
| Cefaclor                                              | 83.5  | 7.2   | 40.4 | 38.4  | 75.8  | 22.8  | 9.2  | 21.6  |
| Cefadroxil Monohydrate                                | 51.0  | -14.1 | 10.1 | -6.1  | 33.8  | 2.9   | 40.2 | 26.7  |
| Cefazolin·Na                                          | 31.6  | -56.7 | 21.1 | 24.7  | 20.0  | -12.2 | 30.8 | 39.9  |
| Cefdinir                                              | 99.8  | 97.5  | 94.0 | 91.3  | 90.1  | 79.3  | 87.2 | 40.5  |
| Cefditoren Pivoxil                                    | 95.5  | 72.5  | 85.1 | 81.3  | 80.7  | 40.1  | 58.6 | 41.3  |
| Cefixime                                              | 86.0  | 46.2  | 71.1 | 50.4  | 84.0  | 60.0  | 68.4 | 36.7  |
| Cefotetan Disodium                                    | 34.7  | -59.5 | 5.0  | 0.7   | 26.8  | -11.3 | 13.1 | 11.8  |
| Cefoxitin·Na                                          | 50.8  | 5.0   | 27.5 | 4.1   | 48.1  | 16.9  | 31.9 | 13.7  |
| Cefpodoxime Proxetil                                  | 77.2  | 9.9   | 58.0 | 18.8  | 66.7  | 15.7  | 50.6 | 38.8  |
| Cefprozil                                             | 64.3  | 16.3  | 30.2 | 8.0   | 44.9  | 13.4  | 10.9 | 32.0  |
| Ceftibuten                                            | 49.7  | -0.5  | 20.0 | -11.3 | 45.5  | -9.3  | 58.9 | 30.3  |
| Ceftizoxim·Na                                         | 63.6  | 5.1   | 29.8 | 4.0   | 60.5  | 20.8  | 47.0 | 28.4  |
| Ceftriaxone·Na                                        | 44.4  | -11.7 | 7.7  | -47.3 | 49.6  | 13.6  | 32.4 | -9.5  |
| Cefuroxime Axetil                                     | 68.5  | 28.2  | 58.7 | 3.0   | 72.1  | 39.8  | 70.6 | 39.7  |
| Cefuroxime·Na                                         | 56.2  | -5.9  | 27.0 | -9.1  | 57.8  | -1.4  | 39.1 | 23.3  |
| Cephalexin Monohydrate                                | 51.4  | -24.4 | 24.0 | 4.1   | 49.7  | 16.3  | 14.0 | 17.1  |
| Chenodiol<br>(Chenodeoxycholic Acid)                  | 24.7  | -26.1 | -0.4 | -13.8 | 25.4  | -14.4 | -4.6 | 16.8  |
| Chlorhexidine<br>Dihydrochloride                      | 96.7  | 93.5  | 67.7 | 63.3  | 27.5  | 77.6  | 51.9 | 35.2  |
| Chlorothiazide                                        | 50.0  | 7.0   | 1.1  | -40.8 | 46.7  | 25.7  | 38.5 | 12.6  |
| Chlorpropamide                                        | 46.9  | -0.8  | 4.0  | -8.1  | 41.4  | -4.3  | 16.3 | 3.5   |
| Chlorthalidone                                        | 24.8  | 7.7   | 9.8  | 13.0  | -8.0  | 11.5  | 12.2 | -0.3  |
| Chlorzoxazone                                         | 38.0  | -7.3  | 1.7  | -24.1 | 23.7  | -7.1  | 22.5 | -2.7  |
| Ciclesonide                                           | 62.2  | 58.6  | 4.4  | 7.4   | -30.2 | -3.3  | 30.7 | -7.1  |
| Ciclopirox                                            | 5.8   | 25.1  | -0.9 | -11.5 | 44.2  | -2.6  | 24.2 | -8.9  |
| Cidofovir                                             | -10.2 | -5.9  | 4.6  | 5.6   | -14.7 | 16.4  | 36.1 | 15.5  |
| Cilostazol                                            | 44.4  | -6.7  | -2.2 | -16.6 | 49.7  | -4.2  | 33.0 | 1.3   |
| Cinacalcet·HCl                                        | 46.4  | 14.2  | 21.7 | -6.5  | -21.9 | -7.7  | 35.9 | 14.2  |
| Cisatracurium Besylate                                | 39.5  | -6.2  | 15.7 | -10.8 | 28.9  | -0.7  | 42.0 | 7.0   |
| Cisplatin (Cis-<br>Diamineplatinum(Ii)<br>Dichloride) | 6.2   | 11.0  | 27.4 | 32.0  | -3.4  | 42.5  | 23.1 | -11.5 |
| Cladribine                                            | 50.0  | -3.2  | 10.2 | -12.7 | 40.9  | 20.9  | 19.0 | 23.1  |
| Clavulanate Potassium                                 | 72.2  | 38.4  | 31.8 | -10.1 | 69.5  | 42.5  | 41.8 | -24.0 |
| Clofazimine                                           | 94.8  | 85.6  | 87.9 | 88.2  | 81.5  | 61.6  | 4.2  | 5.3   |
| Clomipramine·HCl                                      | 43.7  | -12.2 | 3.7  | -8.3  | 44.5  | 16.8  | 19.7 | 18.6  |
| Clotrimazole                                          | 88.6  | 28.8  | 5.7  | -16.0 | 58.5  | -6.0  | 22.1 | 27.8  |
| Cloxacillin·Na                                        | 97.9  | 97.3  | 96.3 | 82.9  | 91.5  | 89.6  | 89.3 | 24.5  |

|                                      |      |       |      |       |      |       |      |       |
|--------------------------------------|------|-------|------|-------|------|-------|------|-------|
| Colchicine                           | 34.9 | 3.0   | 13.2 | -20.3 | 33.3 | 7.7   | 37.6 | 28.0  |
| Colistimethate·Na                    | 51.9 | 4.2   | 28.3 | 2.1   | 49.7 | 24.5  | 38.2 | -1.6  |
| Colistin Sulfate                     | 60.2 | -1.4  | 19.5 | -23.8 | 60.2 | 30.6  | 20.5 | 15.2  |
| Cortisone Acetate                    | 48.0 | 14.0  | 3.0  | -5.3  | 39.9 | 36.7  | 12.6 | -6.1  |
| Cyclobenzaprine·HCl                  | 56.1 | 0.8   | 7.7  | -42.9 | 45.3 | 14.2  | 12.8 | -23.5 |
| Cyclopentolate                       | 50.3 | 17.0  | 8.1  | -30.3 | 43.1 | 41.0  | 35.5 | 26.9  |
| Cycloserine                          | 46.8 | -14.1 | 5.3  | -35.3 | 59.7 | 17.4  | 21.2 | -31.0 |
| Cysteamine·HCl                       | 48.5 | 14.5  | 14.8 | -10.8 | 41.0 | 34.2  | 24.7 | 26.3  |
| Dactinomycin<br>(Actinomycin D)      | 98.9 | 97.7  | 95.2 | 77.1  | 96.3 | 96.9  | 94.1 | -4.2  |
| Dalfampridine (4-<br>Aminopyridine)  | 49.2 | 10.7  | 17.5 | -27.1 | 39.9 | 23.4  | 17.2 | -1.0  |
| Dantrolene·Na                        | 46.7 | -11.9 | 12.3 | -30.6 | 42.3 | -4.6  | 23.1 | 12.1  |
| Dapsone                              | 47.8 | 16.0  | 14.1 | -18.2 | 48.4 | 45.1  | 33.4 | 26.2  |
| Daptomycin                           | 30.9 | -19.4 | 13.2 | -5.8  | 41.3 | -5.3  | 52.5 | 36.2  |
| Darifenacin·HBr                      | 52.9 | 3.2   | 5.4  | -26.5 | 47.1 | 32.3  | 16.1 | -30.1 |
| Darunavir                            | 44.4 | -8.1  | 18.2 | -8.6  | 45.4 | 5.2   | 40.3 | 32.8  |
| Dasatinib                            | 43.8 | 10.6  | 4.4  | -55.7 | 52.6 | 32.9  | 27.7 | -12.7 |
| Decitabine                           | 41.3 | -22.1 | 7.9  | -3.7  | 51.0 | 7.1   | 38.7 | 17.7  |
| Deferasirox                          | 42.6 | -1.6  | -8.1 | -32.5 | 55.9 | 14.6  | 31.8 | -10.7 |
| Deferoxamine Mesylate                | 40.1 | -6.6  | 29.3 | 12.4  | 66.7 | 33.1  | 39.7 | 27.5  |
| Demeclocycline·HCl                   | 98.4 | 96.8  | 93.7 | 78.2  | 95.5 | 95.8  | 79.3 | -2.5  |
| Desipramine·HCl                      | 48.1 | -3.6  | 19.4 | -10.4 | 42.6 | 8.6   | 33.6 | 20.3  |
| Desogestrel                          | 51.2 | -2.0  | 42.4 | -20.0 | 61.4 | 41.3  | 17.2 | -12.3 |
| Desonide                             | 36.6 | -7.0  | 2.6  | -11.8 | 40.1 | -8.3  | 49.2 | 37.8  |
| Desoximetasone                       | 45.5 | 3.1   | 12.1 | -27.1 | 40.3 | 25.5  | 37.3 | 20.7  |
| Desvenlafaxine Succinate<br>Hydrate  | 44.9 | -8.1  | 7.7  | -26.8 | 42.3 | 3.9   | 42.2 | 34.8  |
| Dexchlorpheniramine<br>Maleate       | 36.1 | 1.7   | 16.6 | -26.3 | 43.4 | 17.1  | 42.0 | 30.4  |
| Dexmedetomidine·HCl                  | 38.6 | -15.8 | 8.8  | -1.9  | 38.6 | -0.6  | 43.7 | 36.2  |
| Dexrazoxane                          | 39.1 | -8.7  | 11.5 | -14.9 | 47.3 | 1.3   | 49.8 | 43.0  |
| Diatrizoate Meglumine                | 41.6 | 3.8   | 23.7 | -13.0 | 42.8 | 16.1  | 45.6 | 25.5  |
| Dicloxacillin·Na Salt<br>Monohydrate | 99.3 | 97.7  | 94.3 | 88.6  | 96.9 | 93.1  | 87.1 | 54.8  |
| Dicyclomine·HCl                      | 47.4 | -17.7 | 0.3  | -13.4 | 42.1 | -15.2 | 32.9 | 38.7  |
| Dienogest                            | 36.2 | -2.8  | 6.7  | 9.5   | 42.0 | 18.7  | 38.7 | 24.2  |
| Difluprednate                        | 39.0 | 14.8  | -1.3 | -8.5  | 39.4 | 15.6  | 44.3 | 37.8  |
| Digoxin                              | 40.9 | -25.3 | 3.8  | 14.4  | 38.9 | -1.3  | 45.7 | 34.9  |
| Dimenhydrinate                       | 33.6 | 3.4   | 13.4 | -11.2 | 45.2 | 18.7  | 38.3 | 34.7  |

|                               |      |       |       |       |       |       |       |       |
|-------------------------------|------|-------|-------|-------|-------|-------|-------|-------|
| Disopyramide                  | 34.5 | -27.4 | 16.6  | -3.0  | 37.6  | 3.7   | 42.0  | 27.4  |
| Dopamine·HCl                  | 33.3 | 7.7   | 20.8  | -1.2  | 36.8  | 14.7  | 51.1  | 42.9  |
| Doripenem                     | 38.7 | -12.3 | 19.7  | 9.2   | 36.2  | 7.3   | 7.5   | 4.1   |
| Doxapram·HCl H2O              | 28.4 | 4.7   | 22.4  | 19.3  | 39.5  | 19.0  | 46.4  | 39.2  |
| Doxepin·HCl                   | 22.8 | -24.4 | 8.0   | -19.2 | 33.3  | -11.7 | 29.8  | 27.1  |
| Droperidol                    | 32.3 | -8.4  | -2.8  | 12.9  | 40.9  | 12.1  | 30.8  | 21.2  |
| Drospirenone                  | 25.3 | -24.3 | 4.7   | 17.4  | 0.0   | -4.5  | 21.7  | 1.2   |
| Duloxetine·HCl                | 37.1 | -0.6  | 3.3   | 2.6   | 25.7  | 8.7   | 31.8  | 30.6  |
| Dutasteride                   | 36.1 | -24.5 | 13.3  | -3.1  | 27.8  | -20.9 | 16.6  | 25.5  |
| Dyphylline                    | 37.0 | 7.3   | 16.8  | 12.9  | 28.0  | 9.5   | 23.9  | 24.7  |
| Econazole Nitrate             | 96.4 | 66.4  | 47.0  | 42.4  | 44.0  | -43.6 | 20.6  | 39.4  |
| Eflornithine·HCl              | 35.7 | -33.8 | 14.2  | -17.4 | 23.7  | -16.9 | 13.2  | 19.5  |
| Epinastine·HCl                | 34.2 | 0.9   | 2.2   | -22.3 | 26.2  | 18.2  | 34.3  | 40.1  |
| Epirubicin·HCl                | 96.3 | 97.5  | 88.8  | 82.4  | 53.9  | -0.6  | 24.6  | 14.6  |
| Eplerenone                    | 43.9 | 1.7   | 10.2  | -29.4 | 37.1  | 29.0  | 34.8  | 23.8  |
| Eptifibatide                  | 36.2 | -14.4 | 9.1   | -45.6 | 41.2  | -6.6  | 37.3  | 10.6  |
| Erythromycin                  | 98.4 | 97.4  | 95.4  | 82.7  | 84.9  | 86.6  | 68.5  | 2.1   |
| Estramustine Phosphate·Na     | 37.1 | 12.2  | 10.1  | -26.4 | 45.1  | 18.9  | 43.0  | 37.1  |
| Estropipate                   | 40.9 | -12.7 | 6.1   | -13.2 | 41.5  | 3.1   | -2.7  | 8.5   |
| Eszopiclone                   | 27.9 | -21.7 | 3.4   | -27.3 | 17.2  | -5.2  | 18.3  | 26.8  |
| Ethambutol<br>Dihydrochloride | 5.1  | 10.2  | 10.6  | -26.0 | 23.6  | 50.3  | 27.2  | 4.9   |
| Ethinyl Estradiol             | 1.0  | 8.0   | -11.3 | -41.9 | 13.9  | 15.2  | -29.7 | -31.9 |
| Ethionamide                   | 16.3 | 12.4  | 2.8   | 41.8  | -18.5 | -1.6  | -0.9  | 35.1  |
| Ethosuximide                  | 40.1 | 2.3   | -21.0 | -6.9  | -6.2  | 27.5  | 22.7  | 38.7  |
| Etodolac                      | -0.7 | -8.5  | -12.0 | 13.9  | -39.1 | 10.5  | -2.9  | 28.6  |
| Etomidate                     | 26.4 | -3.2  | -15.2 | 18.2  | 5.7   | -26.8 | 14.6  | 27.0  |
| Etonogestrel                  | 6.3  | 5.0   | -0.3  | 26.8  | -29.2 | -1.7  | -1.5  | 33.5  |
| Everolimus                    | 55.8 | -1.3  | 7.5   | 37.0  | 25.9  | -6.5  | 23.2  | 30.3  |
| Ezetimibe                     | 15.3 | -8.1  | 4.7   | 36.6  | 4.2   | -25.6 | 14.3  | 32.3  |
| Febuxostat                    | 51.2 | -3.0  | -4.9  | 1.6   | 21.8  | -11.2 | 7.4   | 26.6  |
| Fexofenadine·HCl              | 11.7 | -8.4  | 7.3   | 19.1  | -7.2  | -6.8  | 7.1   | 30.5  |
| Fingolimod                    | 99.2 | 97.8  | 81.2  | 78.9  | 33.3  | -26.2 | 28.2  | 10.4  |
| Flavoxate·HCl                 | 30.3 | 25.6  | -1.2  | 26.6  | 2.9   | -17.6 | 1.0   | 39.7  |
| Flucytosine                   | 48.3 | -3.5  | -30.6 | -11.4 | 13.3  | -0.3  | 7.8   | 44.4  |
| Fludarabine Phosphate         | 47.2 | 6.1   | -12.7 | 6.8   | 20.8  | -7.5  | 12.3  | 27.1  |
| Fludrocortisone Acetate       | 61.2 | -0.3  | -26.3 | -11.7 | 51.3  | 28.2  | -13.8 | 11.8  |
| Flunisolide                   | 62.3 | 27.3  | -15.3 | -1.6  | 30.8  | 8.2   | -1.2  | 9.7   |
| Fluocinonide                  | 65.6 | 19.5  | -23.1 | 0.0   | 47.1  | 7.3   | -1.5  | 27.1  |
| Fluorometholone               | 51.5 | 15.9  | -9.3  | 15.4  | 34.0  | -3.5  | 12.3  | 10.9  |

|                                                              |      |       |       |       |      |       |       |       |
|--------------------------------------------------------------|------|-------|-------|-------|------|-------|-------|-------|
| Flurandrenolide                                              | 56.8 | 0.8   | -10.4 | -4.8  | 63.8 | 36.2  | -5.6  | -6.4  |
| Fluticasone Propionate                                       | 65.0 | -6.2  | -24.3 | -10.0 | 43.4 | 18.0  | 18.8  | 18.6  |
| Fluvoxamine Maleate                                          | 44.7 | 6.6   | -24.1 | -14.1 | 21.9 | -10.7 | -18.1 | 13.7  |
| Fomepizole                                                   | 36.7 | -8.6  | -5.9  | 0.8   | 44.7 | -16.6 | 9.9   | 27.9  |
| Formoterol                                                   | 63.4 | 16.6  | -30.6 | -5.9  | 54.6 | 35.5  | -14.9 | 8.1   |
| Foscarnet·Na (Sodium Phosphono-formate Tribasic Hexahydrate) | 33.0 | -0.1  | -11.8 | -14.7 | 27.3 | -10.9 | -14.2 | 12.7  |
| Fosfomycin Calcium                                           | 87.8 | 64.4  | 19.6  | -0.7  | 67.0 | 32.4  | 51.0  | 25.3  |
| Fosphenytoin·2Na                                             | 31.8 | -3.2  | -14.6 | 7.0   | 22.8 | -20.9 | -4.7  | 36.4  |
| Gemifloxacin                                                 | 95.2 | 98.8  | 95.5  | 88.8  | 81.5 | 65.7  | 53.5  | 43.6  |
| Glycopyrrolate Iodide                                        | 48.7 | -10.6 | -19.0 | -9.2  | 47.7 | 19.2  | -3.8  | 31.5  |
| Griseofulvin                                                 | 65.8 | 13.8  | -19.4 | -17.2 | 36.3 | 13.5  | 12.2  | 31.4  |
| Guanidine·HCl                                                | 52.5 | -5.6  | -6.6  | -6.1  | 51.2 | 17.7  | 0.6   | -12.0 |
| Halcinonide                                                  | 43.6 | 6.3   | -18.9 | 3.9   | 27.3 | -9.0  | 2.5   | 22.5  |
| Halobetasol Propionate                                       | 34.8 | -4.6  | -27.0 | 10.5  | 28.3 | -16.9 | -3.4  | 21.7  |
| Hexachlorophene                                              | 99.6 | 96.3  | 94.7  | 91.5  | 90.3 | 68.4  | 60.5  | 27.1  |
| Homatropine Methylbromide                                    | 76.0 | 21.7  | -28.2 | -8.0  | 34.5 | -2.6  | 3.0   | -7.8  |
| Hydralazine·HCl                                              | 62.0 | 16.6  | -11.3 | -1.4  | 47.2 | 24.3  | -13.0 | -30.2 |
| Hydrochlorothiazide                                          | 58.8 | 8.9   | -19.1 | -1.5  | 52.5 | 16.5  | -1.6  | -6.9  |
| Hydroflumethiazide                                           | 51.9 | 10.4  | -5.2  | -12.7 | 49.9 | 19.0  | 9.4   | -1.0  |
| Hydroxocobalamin·HCl                                         | 59.2 | 14.1  | -18.5 | -9.1  | 49.9 | 15.9  | -11.9 | -11.1 |
| Hydroxychloroquine Sulfate                                   | 57.1 | 13.6  | -4.1  | -11.0 | 48.6 | 28.4  | -32.7 | 4.2   |
| Hydroxyurea                                                  | 70.9 | 14.6  | -24.3 | -30.2 | 50.7 | 2.8   | 6.6   | 14.9  |
| Hydroxyzine Dihydrochloride                                  | 45.0 | 5.7   | -29.0 | 16.2  | 25.8 | -14.1 | 11.0  | 9.7   |
| Ibutilide Fumarate                                           | 29.3 | -21.4 | -23.3 | 23.1  | 35.2 | -21.8 | 2.3   | 21.6  |
| Iloperidone                                                  | 57.3 | 10.7  | -31.5 | -27.9 | 31.0 | -3.0  | -2.5  | 7.2   |
| Indinavir                                                    | 58.5 | -25.4 | -26.5 | 12.1  | 51.6 | -4.2  | -10.2 | 19.6  |
| Irbesartan                                                   | 67.8 | 26.6  | -21.8 | -24.5 | 40.2 | 6.9   | 2.8   | -2.3  |
| Irinotecan·HCl                                               | 58.3 | 0.2   | -12.4 | -2.8  | 51.6 | 18.3  | -8.8  | 16.7  |
| Isocarboxazid                                                | 57.9 | 19.4  | -13.2 | -14.4 | 46.3 | 5.2   | 4.9   | 20.5  |
| Isosorbide Dinitrate                                         | 51.3 | -2.4  | -18.2 | -24.4 | 61.2 | 28.7  | -28.1 | 1.5   |
| Isotretinoin (13-Cis-Retinoic Acid)                          | 63.9 | 23.9  | -11.0 | -21.4 | 43.7 | 12.9  | -5.0  | -16.5 |
| Isradipine                                                   | 61.6 | 3.4   | -10.5 | -2.5  | 49.8 | 14.5  | 2.7   | 14.4  |
| Kanamycin Sulfate                                            | 97.9 | 96.9  | 97.0  | 94.5  | 26.4 | 8.6   | -44.6 | -18.1 |
| Ketorolac Tromethamine                                       | 5.7  | -13.7 | -2.1  | 3.9   | 7.3  | -31.1 | 18.4  | 37.7  |



|                                                  |      |       |       |       |       |       |       |       |
|--------------------------------------------------|------|-------|-------|-------|-------|-------|-------|-------|
| Labetalol·HCl                                    | 55.4 | -1.6  | -18.8 | -45.7 | 46.6  | 0.1   | 14.4  | 14.8  |
| Lacosamide                                       | 61.8 | -18.3 | 15.7  | 1.8   | 43.1  | -25.5 | 35.0  | 30.5  |
| Lactulose                                        | 69.4 | 17.3  | -16.6 | -17.4 | 49.3  | 22.3  | 7.5   | 20.8  |
|                                                  |      |       |       |       |       |       |       |       |
| Lamivudine                                       | 37.1 | -21.4 | 26.2  | -14.6 | 39.7  | -25.2 | 37.0  | 27.6  |
| Lansoprazole                                     | 57.7 | 15.3  | -11.8 | -35.8 | 50.3  | -0.5  | 5.6   | 23.9  |
| Lenalidomide                                     | 37.5 | -17.1 | 9.3   | -21.3 | 42.0  | -12.2 | 19.1  | 29.0  |
| Leucovorin Calcium<br>Pentahydrate               | 61.3 | 5.3   | -6.8  | -0.5  | 50.5  | 16.6  | -1.0  | 12.0  |
| Levalbuterol·HCl                                 | 42.8 | -16.1 | 11.2  | 8.6   | 37.4  | -12.0 | 34.1  | 30.0  |
| Levobunolol·HCl                                  | 25.4 | -6.8  | 6.6   | 11.0  | 12.9  | -43.6 | 45.0  | 20.2  |
| Levocarnitine                                    | 14.1 | -19.3 | -1.8  | 5.2   | 12.8  | -1.6  | -1.0  | 7.2   |
| Levocetirizine<br>Dihydrochloride                | 36.6 | -4.9  | 8.6   | -34.4 | 27.5  | -15.3 | 27.1  | 23.6  |
| Levothyroxine·Na                                 | 85.5 | 52.1  | -21.4 | -17.8 | -0.4  | -14.9 | -34.9 | -0.8  |
| Lindane                                          | 44.5 | 2.5   | 12.6  | -23.9 | 27.2  | -11.6 | 36.3  | 26.5  |
| Liothyronine·Na                                  | 30.0 | -19.5 | 15.6  | -23.2 | 28.7  | -49.5 | 23.3  | 22.0  |
| Lopinavir                                        | 43.7 | -6.5  | 11.4  | -30.6 | 43.6  | -17.5 | 42.4  | 41.1  |
| Loteprednol Etabonate                            | 42.2 | 4.2   | 9.1   | 5.8   | 41.3  | 2.8   | 35.9  | 24.9  |
| Loxapine Succinate                               | 41.8 | -33.1 | 12.2  | -0.3  | 18.9  | -65.5 | 42.7  | 46.3  |
| Mafenide·HCl                                     | 7.5  | -2.3  | 24.7  | 30.5  | -5.1  | -7.1  | 1.0   | 28.7  |
| Malathion                                        | 55.3 | 14.7  | 1.5   | 13.3  | 30.7  | -0.2  | 17.6  | 14.8  |
| Mannitol                                         | 59.9 | 18.0  | -9.7  | -8.0  | 58.1  | 33.1  | -0.7  | 27.9  |
| Maraviroc                                        | 54.4 | 1.3   | 0.2   | -7.5  | 34.8  | 25.4  | 0.7   | -24.3 |
| Mechlorethamine·HCl                              | 48.0 | 9.0   | -20.1 | -36.8 | 47.1  | 18.8  | -7.0  | 22.0  |
| Meclizine Dihydrochloride                        | 68.1 | 21.7  | -19.4 | 3.2   | 52.0  | 11.4  | 8.7   | 41.0  |
| Meclofenamate·Na                                 | 37.8 | 11.9  | 13.9  | 8.7   | 32.5  | 1.1   | 23.0  | 39.7  |
| Mefloquine·HCl                                   | 70.3 | -7.2  | 12.0  | 21.3  | 34.0  | -4.7  | 6.5   | 11.6  |
| Mepenzolate Bromide                              | 63.8 | 12.6  | -14.3 | -7.7  | 62.8  | 21.9  | -3.6  | 3.5   |
| Mepivacaine·HCl                                  | 47.7 | -8.7  | -7.5  | -4.5  | 50.8  | 25.7  | -13.1 | -22.5 |
| Mequinol                                         | 48.7 | -11.2 | 6.5   | -20.0 | 20.8  | -6.2  | 16.1  | 22.8  |
| Mercaptopurine Hydrate                           | -1.6 | -16.6 | 20.1  | 28.0  | -14.5 | -0.6  | 10.2  | 33.6  |
| Mesna                                            | 43.3 | -15.6 | 9.4   | 15.6  | 27.8  | -25.1 | 30.6  | 2.3   |
| Mestranol                                        | 4.5  | 4.3   | 25.6  | 36.8  | -10.2 | -16.0 | 9.4   | 31.0  |
| Metaproterenol<br>Hemisulfate<br>(Orciprenaline) | 14.5 | 17.1  | 8.2   | 23.6  | 26.5  | -3.9  | 17.7  | 25.0  |
| Metaraminol Bitartrate                           | -4.8 | -8.4  | 27.8  | 33.6  | -14.3 | 5.6   | 3.9   | 25.3  |
| Metaxalone                                       | 48.7 | -9.6  | 18.1  | 3.2   | 28.4  | -7.0  | 12.6  | 8.2   |
| Methacholine Chloride                            | 5.2  | 6.0   | 45.8  | 35.6  | -4.9  | -0.9  | -0.9  | 16.9  |

|                                                               |      |       |       |       |      |      |       |       |
|---------------------------------------------------------------|------|-------|-------|-------|------|------|-------|-------|
| Methazolamide                                                 | 52.6 | 11.9  | 6.0   | -3.6  | 20.3 | -3.6 | 7.3   | 22.5  |
| Methenamine Hippurate                                         | 46.8 | 1.9   | -5.4  | 11.9  | 33.4 | -0.2 | 29.5  | 15.5  |
| Methocarbamol                                                 | 52.2 | 2.8   | -17.0 | -46.3 | 40.5 | 9.6  | 2.6   | 20.5  |
| Methotrexate                                                  | 58.7 | 35.3  | 9.1   | -9.4  | 38.8 | 10.3 | 32.1  | 15.0  |
| Methoxsalen (Xanthotoxin)                                     | 48.9 | -10.8 | 3.5   | -8.1  | 57.9 | 28.7 | -6.0  | 13.8  |
| Methscopolamine Bromide<br>(-)-Scopolamine Methyl<br>Bromide) | 55.9 | 19.1  | 11.4  | 17.2  | 31.9 | 9.2  | 17.2  | -1.6  |
| Methsuximide                                                  | 51.8 | 6.4   | -13.5 | -23.1 | 52.4 | 27.9 | -10.9 | 3.2   |
| Methyclothiazide                                              | 45.8 | 15.7  | 10.1  | 1.0   | 33.9 | 22.9 | 10.7  | 2.3   |
| Methyl<br>Aminolevulinate·HCl                                 | 55.5 | -4.5  | -9.3  | -11.2 | 59.2 | 31.2 | -8.4  | 24.8  |
| Methylergonovine Maleate                                      | 48.8 | 26.9  | 31.6  | 6.6   | 33.2 | 8.4  | 12.0  | -15.6 |
| Metolazone                                                    | 58.5 | 10.7  | -12.9 | -20.3 | 44.5 | 28.1 | -5.7  | 6.7   |
| Metirapone                                                    | 56.6 | 23.8  | -5.1  | -46.1 | 48.1 | 32.5 | -13.3 | 3.4   |
| Mexiletine·HCl                                                | 54.0 | 13.1  | -12.8 | -11.3 | 56.2 | 31.4 | -7.6  | 21.7  |
| Micafungin                                                    | 47.9 | -20.6 | 1.5   | -13.2 | 45.3 | 24.0 | -8.1  | -20.0 |
| Miconazole                                                    | 97.7 | 95.0  | 82.0  | 91.8  | 76.0 | 41.5 | -15.4 | 24.5  |
| Midodrine·HCl                                                 | 74.2 | 31.1  | 9.4   | -16.6 | 62.0 | 53.8 | -7.1  | 20.7  |
| Miglitol                                                      | 45.9 | -27.6 | 7.7   | -4.6  | 43.2 | 15.7 | 5.5   | -14.4 |
| Milnacipran·HCl                                               | 55.5 | 21.5  | 11.9  | -27.1 | 66.1 | 54.3 | 6.0   | -15.4 |
| Mirtazapine                                                   | 42.8 | -19.7 | -3.0  | -24.6 | 44.9 | 25.2 | -14.1 | -45.6 |
| Mitotane                                                      | 45.5 | -3.1  | 11.5  | -24.1 | 48.5 | 31.6 | 1.5   | -18.2 |
| Moexipril·HCl                                                 | 50.2 | 4.4   | 3.3   | -24.7 | 44.1 | 30.0 | 9.0   | -6.0  |
| Mometasone Furoate                                            | 55.5 | 8.9   | -23.4 | -19.0 | 41.3 | 1.2  | 5.4   | 3.3   |
| Mupirocin                                                     | 99.1 | 97.4  | 94.2  | 89.6  | 90.9 | 92.6 | 57.3  | 4.6   |
| Nadolol                                                       | 50.0 | -0.3  | 7.6   | -0.5  | 49.0 | 26.8 | -5.1  | -15.4 |
| Nafcillin·Na                                                  | 98.2 | 98.0  | 93.6  | 89.8  | 90.7 | 76.8 | 51.8  | 8.9   |
| Naftifine·HCl                                                 | 40.4 | -4.7  | -9.2  | -14.4 | 47.2 | 20.9 | 8.1   | -10.9 |
| Naratriptan·HCl                                               | 47.6 | -2.3  | -0.7  | -37.9 | 47.2 | 36.8 | -22.0 | -55.9 |
| Natamycin                                                     | 47.5 | -3.8  | -9.7  | -27.2 | 38.3 | 11.7 | -3.7  | -24.4 |
| Nebivolol·HCl                                                 | 58.5 | 19.1  | -4.9  | -35.5 | 47.7 | 21.9 | -5.3  | -3.8  |
| Nelarabine                                                    | 49.5 | -16.5 | 0.9   | -17.9 | 43.3 | 4.9  | 8.9   | 30.3  |
| Nepafenac                                                     | 53.1 | 15.6  | -13.3 | -13.4 | 45.5 | 15.6 | -0.6  | -8.2  |
| Nevirapine                                                    | 55.9 | -11.7 | 8.5   | 11.9  | 45.5 | 14.3 | 17.5  | 37.0  |
| Niacin (Vitamin B3/<br>Nicotinic Acid/ Vitamin<br>Pp)         | 46.8 | 8.6   | -10.6 | -3.2  | 51.3 | 20.6 | -4.7  | -37.7 |
| Nicotine                                                      | 55.8 | -8.4  | -7.9  | -2.2  | 47.2 | 10.0 | 0.3   | 34.3  |
| Nilotinib                                                     | 72.0 | 43.0  | -34.9 | -14.5 | 62.4 | 42.2 | 2.2   | -2.7  |

|                                              |      |       |       |       |       |       |       |       |
|----------------------------------------------|------|-------|-------|-------|-------|-------|-------|-------|
| Nilutamide                                   | 49.7 | -11.3 | -5.0  | 5.2   | 43.7  | 13.2  | 1.5   | 20.4  |
| Nitazoxanide                                 | 71.3 | 57.0  | -3.3  | -34.9 | 62.7  | 56.6  | 36.2  | -20.9 |
| Nitisinone                                   | 59.7 | 3.7   | -10.2 | 5.3   | 43.6  | 16.3  | 7.9   | 13.1  |
| Nitrofurantoin                               | 60.2 | 13.2  | -2.5  | -11.6 | 56.4  | 27.0  | 0.7   | 27.2  |
| Nizatidine                                   | 34.9 | -21.3 | 22.4  | -26.9 | 42.6  | -18.5 | 48.3  | 43.9  |
| Nortriptyline·HCl                            | 56.3 | 5.0   | 1.2   | 3.0   | 44.2  | 9.8   | -3.9  | 26.0  |
| Olsalazine·Na                                | 33.1 | -28.5 | 18.6  | 12.8  | 43.6  | -15.8 | 40.7  | 32.2  |
| Orlistat<br>(Tetrahydrolipstatin)            | 55.8 | 4.1   | 4.6   | -4.6  | 43.5  | -4.3  | 20.2  | 33.4  |
| Oxaprozin                                    | 35.3 | -20.8 | 11.7  | 22.3  | 44.5  | -4.9  | 33.6  | 30.8  |
| Oxtriphylline                                | 31.4 | -34.5 | 26.7  | 2.4   | 46.5  | -7.5  | 20.3  | 24.7  |
| Oxybutynin Chloride                          | 54.1 | 20.5  | 0.0   | -19.7 | 54.0  | 20.0  | 0.3   | 10.4  |
| Oxytetracycline·HCl                          | 98.7 | 97.1  | 93.1  | 89.3  | 93.4  | 90.8  | 66.3  | 4.7   |
| Paliperidone                                 | 31.4 | -1.0  | 20.8  | -6.1  | 43.6  | -0.6  | 42.2  | 34.3  |
| Palonosetron·HCl                             | 32.7 | -38.5 | 25.5  | -26.6 | 23.6  | -37.6 | 38.2  | 41.2  |
| Paromomycin Sulfate                          | 97.1 | 94.7  | 81.6  | 78.6  | 50.4  | 7.4   | 48.4  | 33.7  |
| Pazopanib·HCl                                | 24.3 | -2.3  | 10.4  | -4.1  | 19.3  | -24.6 | 14.4  | 32.7  |
| Pemetrexed Disodium                          | 10.1 | -6.5  | 22.6  | 15.4  | 7.2   | -4.8  | 27.1  | 26.0  |
| Pemirolast Potassium                         | 21.1 | -35.0 | 24.8  | 17.0  | 27.3  | -39.3 | 30.4  | 40.3  |
| Penicillamine (D-<br>Penicillamine)          | 54.9 | 18.0  | 33.5  | 22.8  | 62.4  | 27.0  | 38.4  | 27.6  |
| Penicillin G Potassium<br>(Benzylpenicillin) | 97.5 | 94.2  | 96.6  | 92.9  | 88.8  | 73.1  | 74.5  | 60.7  |
| Pentamidine Isethionate                      | 39.0 | -10.7 | 19.7  | -10.9 | 43.5  | -6.7  | 17.9  | 6.6   |
| Pentostatin                                  | 34.2 | -31.2 | 26.9  | -2.6  | 25.1  | -29.0 | 23.5  | 28.5  |
| Perindopril Erbumine                         | 3.2  | 8.6   | 32.0  | 29.0  | -3.1  | 3.0   | 11.8  | 20.7  |
| Permethrin                                   | 57.3 | 33.6  | 2.9   | -21.6 | 38.0  | 11.6  | 14.5  | 9.6   |
| Perphenazine                                 | 65.6 | 32.1  | 7.1   | -20.4 | 72.7  | 58.3  | 2.0   | -2.3  |
| Phenelzine Sulfate                           | 40.9 | -1.1  | 2.6   | -12.8 | 44.5  | 39.7  | -15.1 | -23.1 |
| Phenylephrine                                | 46.6 | 20.5  | -1.8  | -11.3 | 46.7  | 32.9  | 3.7   | -8.2  |
| Phytonadione                                 | 53.9 | 15.2  | -1.4  | -17.1 | 46.7  | 11.2  | 3.1   | 21.0  |
| Pimecrolimus                                 | 32.2 | -3.0  | 29.1  | -12.4 | 28.3  | 13.1  | 23.2  | 32.2  |
| Pitavastatin Calcium                         | 46.0 | -8.1  | 22.3  | 9.6   | 25.4  | 0.6   | 21.1  | 16.7  |
| Podofilox                                    | 53.3 | 6.9   | -4.9  | -36.6 | 54.7  | 37.7  | -2.3  | 22.7  |
| Posaconazole                                 | 8.3  | 9.8   | 34.9  | 56.3  | -13.6 | 5.0   | 5.7   | -4.0  |
| Pralidoxime Chloride                         | 40.8 | -11.2 | 15.5  | 0.1   | 26.0  | 0.7   | 9.8   | 30.3  |
| Prasugrel                                    | 2.9  | 11.5  | 22.7  | 19.5  | 0.5   | 5.6   | -4.3  | 39.9  |
| Pravastatin·Na                               | 42.1 | 0.4   | 8.8   | 4.8   | 31.8  | -2.7  | 17.6  | 4.7   |
| Prilocaine·HCl                               | 35.6 | -11.2 | 20.8  | 16.7  | 35.3  | -14.9 | 9.6   | -28.5 |
| Primidone                                    | -0.9 | -1.3  | 12.2  | 26.8  | -11.4 | 0.8   | 1.4   | 21.3  |

|                                |      |       |       |       |      |       |       |       |
|--------------------------------|------|-------|-------|-------|------|-------|-------|-------|
| Probenecid                     | 41.2 | -8.8  | 14.2  | -7.3  | 27.7 | 14.5  | -8.2  | -3.2  |
| Proparacaine·HCl               | 38.3 | 6.6   | 15.8  | 0.2   | 21.2 | -21.3 | 37.8  | 10.4  |
| Propylthiouracil               | 51.7 | 35.7  | 1.7   | 16.3  | 39.8 | 25.2  | 19.3  | 7.6   |
| Protriptyline·HCl              | 59.5 | 5.2   | -7.5  | -37.9 | 56.0 | 36.3  | -21.8 | -14.2 |
| Pyrazinamide                   | 45.2 | 20.9  | 14.7  | -0.6  | 34.1 | 11.9  | 27.0  | 22.6  |
| Pyridostigmine Bromide         | 50.7 | 2.5   | -10.4 | -36.7 | 63.9 | 32.0  | 11.1  | 10.0  |
| Pyrimethamine                  | 50.6 | 22.9  | 15.4  | 13.6  | 39.0 | 14.1  | 25.8  | -18.7 |
| Quinidine·HCl·H <sub>2</sub> O | 47.3 | 2.7   | -0.4  | -6.1  | 63.6 | 47.2  | 12.5  | 6.5   |
| Rabeprazole·Na                 | 52.3 | 26.9  | 9.8   | 18.8  | 28.7 | 17.1  | 9.2   | -1.9  |
| Raltegravir potassium          | 54.6 | -2.1  | -5.6  | -2.4  | 60.3 | 67.0  | -30.5 | -23.4 |
| Ramelteon                      | 54.5 | 38.2  | 7.7   | -3.4  | 31.5 | 18.1  | 13.5  | 5.1   |
| Rasagiline Mesylate            | 53.7 | 15.2  | 2.0   | -26.7 | 44.1 | 17.8  | 26.1  | 14.0  |
| Regadenoson                    | 48.8 | 26.9  | 11.2  | -8.1  | 65.7 | 53.1  | 8.7   | 7.5   |
| Repaglinide                    | 45.9 | -12.6 | -10.1 | -18.9 | 47.8 | 24.5  | -62.1 | -54.3 |
| Reserpine                      | 55.0 | 26.7  | -1.3  | -42.7 | 64.3 | 51.2  | 0.5   | 2.3   |
| Rifabutin                      | 98.4 | 97.6  | 96.9  | 92.4  | 94.2 | 95.8  | 88.5  | 22.4  |
| Rifapentine                    | 96.1 | 98.9  | 94.9  | 90.6  | 95.5 | 98.5  | 84.9  | 24.2  |
| Rifaximin                      | 97.8 | 98.0  | 96.2  | 90.6  | 96.5 | 94.9  | 52.2  | -10.0 |
| Ritonavir                      | 61.7 | 28.0  | -11.8 | -9.4  | 63.9 | 62.1  | -26.8 | -21.6 |
| Rizatriptan Benzoate           | 45.8 | -0.3  | 2.1   | -15.0 | 50.5 | 27.9  | -6.9  | -40.9 |
| Ropinirole·HCl                 | 66.7 | 41.7  | 0.3   | -5.1  | 58.4 | 38.4  | 12.5  | 8.0   |
| Ropivacaine·HCl<br>Monohydrate | 47.1 | -12.7 | 16.2  | -21.7 | 49.6 | 28.9  | 2.3   | -12.8 |
| Rosuvastatin Calcium           | 53.8 | 5.4   | 2.9   | -13.6 | 57.3 | 49.9  | -1.7  | -42.5 |
| Rufinamide                     | 46.0 | -6.7  | 3.9   | -28.8 | 49.6 | 29.7  | -26.8 | -23.7 |
| Saquinavir Mesylate            | 51.7 | 6.6   | -4.0  | -4.4  | 90.7 | 80.3  | 23.3  | 5.2   |
| Selegiline·HCl                 | 53.1 | -21.0 | -13.7 | -25.2 | 44.9 | 11.6  | 0.5   | -11.4 |
| Sertraline·HCl                 | 99.6 | 98.2  | 98.3  | 95.9  | 54.7 | 24.2  | -21.1 | -33.7 |
| Silver Sulfadiazine            | 40.5 | 1.5   | 7.6   | -2.4  | 49.5 | 31.7  | 4.1   | -27.8 |
| Sitagliptin Phosphate          | 45.2 | 11.2  | 6.7   | -45.4 | 50.2 | 40.1  | -25.2 | -53.2 |
| Sorafenib Tosylate             | 72.8 | 15.3  | 36.1  | 24.8  | 58.3 | 27.4  | 1.2   | -19.3 |
| Stavudine                      | 47.4 | 16.9  | -5.0  | -15.5 | 48.5 | 40.3  | -1.5  | -11.1 |
| Streptozocin                   | 58.5 | 7.1   | 5.8   | -26.6 | 58.3 | 33.7  | 1.7   | -9.0  |
| Sulconazole Nitrate            | 98.0 | 93.1  | 64.9  | 60.6  | 76.1 | 56.6  | 6.9   | -22.3 |
| Sulfacetamide·Na               | 55.2 | 1.8   | 4.9   | -12.9 | 55.8 | 23.9  | -10.7 | -16.2 |
| Sulfamethoxazole               | 63.4 | 18.5  | -4.9  | -27.5 | 52.2 | 41.9  | 12.0  | -10.4 |
| Sulfanilamide                  | 55.5 | 5.8   | -7.3  | 12.9  | 51.4 | 19.5  | 18.7  | 24.3  |
| Sunitinib Malate               | 42.4 | 16.9  | -15.2 | -18.5 | 59.1 | 45.6  | -11.5 | -36.4 |
| Tacrolimus (Fk506)             | 56.1 | -6.2  | -9.3  | -1.5  | 53.8 | 15.6  | 4.5   | 25.7  |
| Tadalafil                      | 43.6 | 18.8  | -2.2  | -17.3 | 40.9 | 19.0  | -7.9  | -7.3  |

|                             |       |       |       |       |       |       |       |       |
|-----------------------------|-------|-------|-------|-------|-------|-------|-------|-------|
| Tazarotene                  | 48.5  | -9.4  | -12.9 | 9.4   | 46.8  | 5.2   | 0.7   | 22.9  |
| Telbivudine                 | 37.6  | 31.5  | 3.0   | -20.0 | 48.9  | 39.1  | -27.6 | -20.1 |
| Telithromycin               | 98.5  | 96.8  | 91.6  | 88.0  | 95.7  | 97.0  | 94.1  | 43.7  |
| Temsirolimus                | 31.9  | -8.7  | 31.6  | -0.2  | 40.6  | -5.0  | 20.8  | 9.8   |
| Teniposide                  | 98.1  | 97.1  | 85.6  | 86.8  | 87.6  | 71.3  | 38.0  | 26.3  |
| Tenofovir                   | 37.9  | -25.8 | 32.7  | 8.5   | 44.9  | 7.8   | 24.4  | 13.0  |
| Terbutaline Hemisulfate     | 55.0  | -2.8  | 0.3   | -13.4 | 45.4  | 5.9   | 6.3   | 13.8  |
| Terconazole                 | 24.5  | -15.4 | 28.4  | 12.6  | 48.1  | 8.7   | 25.4  | 15.4  |
| Testosterone Enanthate      | 48.9  | 2.2   | -5.2  | 10.0  | 58.4  | 29.3  | 5.4   | 15.8  |
| Tetrabenazine               | 30.7  | -17.0 | 23.6  | 14.5  | 55.7  | 11.7  | 3.9   | 13.9  |
| Tetrahydrozoline·HCl        | 57.8  | 4.5   | -7.1  | -17.9 | 73.6  | 48.3  | 3.0   | 28.7  |
| Theophylline                | 32.3  | -7.6  | 23.5  | 0.7   | 41.0  | 5.5   | 16.8  | 15.2  |
| Thioguanine (6-Thioguanine) | 30.9  | 5.3   | 22.0  | -8.8  | 39.1  | 16.8  | 19.7  | 20.1  |
| Thiotepa                    | 32.7  | -21.1 | 18.2  | 0.8   | 19.2  | -33.5 | 26.9  | 24.3  |
| Tiagabine·HCl               | 32.0  | -20.8 | 19.9  | 34.8  | 22.2  | -17.2 | 24.5  | 19.3  |
| Tigecycline                 | 39.8  | 5.1   | 28.3  | 10.8  | 45.6  | 20.3  | -7.3  | 8.7   |
| Tiludronate Disodium        | 0.5   | -17.4 | 10.3  | 28.6  | -25.7 | -20.8 | 4.9   | 15.0  |
| Tiopronin                   | 9.3   | 0.8   | 11.4  | 17.7  | 7.6   | -5.1  | 15.1  | 16.8  |
| Tirofiban·HCl monohydrate   | 16.9  | -20.4 | 28.1  | 20.1  | 24.1  | -14.0 | 11.0  | 4.5   |
| Tolterodine Tartrate        | 26.9  | 10.2  | 21.4  | -11.1 | 41.3  | 23.8  | -16.1 | -0.2  |
| Tolvaptan                   | 20.5  | -19.7 | 19.6  | 14.4  | 30.8  | -22.6 | 41.1  | 27.1  |
| Topiramate                  | -0.4  | 9.8   | 18.2  | 32.1  | -26.5 | 19.1  | -22.1 | -4.1  |
| Torsemide                   | 54.4  | 34.5  | -0.1  | 1.0   | 28.8  | 6.0   | 21.8  | 23.1  |
| Trandolapril                | 57.2  | 35.7  | -12.2 | -22.6 | 59.0  | 48.0  | -4.0  | -17.0 |
| Travoprost                  | 41.9  | 12.9  | 14.8  | -19.3 | 50.8  | 39.3  | -4.0  | -25.6 |
| Trazodone·HCl               | 43.4  | 24.4  | 0.7   | -27.8 | 45.6  | 43.4  | -13.8 | -19.6 |
| Tretinoin                   | 54.4  | 18.3  | -7.3  | -15.4 | 51.3  | 27.8  | 3.6   | 12.6  |
| Triamcinolone Acetonide     | 36.6  | 4.8   | 12.3  | -8.6  | 39.6  | 13.6  | 15.3  | 10.6  |
| Triamterene                 | 48.3  | 1.6   | 8.6   | -1.5  | 21.3  | -24.3 | 39.4  | 1.6   |
| Trientine Dihydrochloride   | 52.7  | 13.5  | -6.8  | -23.2 | 51.5  | 20.4  | 11.5  | -1.9  |
| Trihexyphenidyl·HCl         | -4.1  | 13.2  | 25.1  | 26.7  | -10.3 | 8.9   | -0.6  | -7.8  |
| Trimethadione               | 44.2  | 34.0  | 5.0   | 14.4  | 20.9  | 9.2   | 38.2  | 20.4  |
| Trimethobenzamide·HCl       | 58.4  | 31.5  | 3.4   | 2.8   | 67.5  | 60.6  | -0.4  | -19.1 |
| Trimipramine Maleate        | 51.9  | 17.1  | 12.1  | -6.0  | 57.8  | 50.8  | 9.7   | -30.7 |
| Trospium Chloride           | 38.5  | 22.8  | -4.5  | -7.6  | 47.8  | 44.5  | -2.6  | -24.1 |
| Ursodiol                    | 59.2  | 19.7  | 3.2   | -19.4 | 55.5  | 52.9  | 3.8   | 5.7   |
| Valganciclovir·HCl          | 37.0  | 5.2   | 19.8  | 3.8   | 41.6  | 22.6  | 10.8  | 3.9   |
| Valsartan                   | -12.9 | 8.1   | 30.7  | 22.5  | -24.0 | 46.7  | -21.9 | -25.9 |

|                           |      |       |      |       |      |       |       |      |
|---------------------------|------|-------|------|-------|------|-------|-------|------|
| Vancomycin·HCl            | 96.9 | 96.6  | 78.9 | 70.1  | 91.9 | 95.2  | 85.4  | 12.2 |
| Varenicline Tartrate      | 43.5 | -4.1  | 20.8 | 11.9  | 15.5 | -16.3 | 41.9  | 26.7 |
| Vigabatrin                | 46.6 | 1.4   | -7.8 | -24.2 | 65.1 | 49.1  | -0.6  | -3.4 |
| Voriconazole              | 20.2 | 5.2   | -3.3 | -3.5  | 13.7 | -7.3  | 5.2   | -6.3 |
| Warfarin·Na               | 40.8 | 1.7   | 6.0  | -12.8 | 49.2 | 19.7  | 3.6   | 1.6  |
| Zaleplon                  | 51.4 | -5.8  | 5.2  | -17.7 | 53.3 | 38.0  | -17.6 | 8.4  |
| Zanamivir                 | 28.3 | -15.4 | 21.0 | 2.3   | 45.3 | 12.3  | 7.1   | -3.7 |
| Ziprasidone hydrochloride | 19.0 | -8.5  | 19.9 | -2.9  | 11.6 | -8.1  | -24.6 | 9.9  |

<sup>1</sup> Results are averages from two separate experiments.
