# Supplementary material for: Screening of FDA-Approved Drugs Using a 384-Well Plate-Based Biofilm Platform: The Case of Fingolimod
Source: MDPI journal article supplement (doi:10.3390/microorganisms8111834), 2020-11-21
Supplement: s1 [file s1]

**Supplementary table 2.** Compounds and results of the activity confirmation of the initial pre-exposure hits from the Screen-Well FDA Approved Drug Library Version 2 (ENZO Life Sciences) at 10  $\mu$ M against *Staphylococcus aureus* ATCC 25923.

| Compound name                       | Average inhibition % <sup>1</sup> |           |           |         |               |           |           |         |
|-------------------------------------|-----------------------------------|-----------|-----------|---------|---------------|-----------|-----------|---------|
|                                     | Pre-exposure                      |           |           |         | Post-exposure |           |           |         |
|                                     | Planktonic                        |           | Biofilm   |         | Planktonic    |           | Biofilm   |         |
|                                     | Turbidity                         | Viability | Viability | Biomass | Turbidity     | Viability | Viability | Biomass |
| Clindamycin-HCl                     | 96.3                              | 94.6      | 98.1      | 100.0   | 71.8          | 65.4      | 39.2      | 11.0    |
| Lincomycin-HCl monohydrate          | 99.4                              | 99.2      | 100.7     | 97.2    | 61.5          | 75.8      | 62.2      | 20.8    |
| Linezolid                           | 96.7                              | 97.4      | 99.1      | 95.6    | 71.3          | 65.2      | 5.6       | 19.8    |
| Sertaconazole                       | 99.8                              | 98.9      | 99.2      | 99.7    | 38.4          | -41.3     | 21.3      | 38.0    |
| Cefepime-2HCl Hydrate               | 99.7                              | 98.7      | 102.0     | 94.5    | 91.1          | 78.0      | 76.1      | 49.7    |
| Idarubicin-HCl                      | 99.3                              | 98.9      | 101.8     | 98.4    | 57.5          | -19.5     | -78.7     | 2.2     |
| Auranofin                           | 98.2                              | 99.2      | 100.3     | 95.6    | 90.4          | 86.0      | 66.9      | 42.2    |
| Moxifloxacin-HCl                    | 98.5                              | 99.3      | 100.4     | 98.7    | 86.7          | 81.2      | 77.3      | 36.5    |
| Rifampin (Rifampicin)               | 98.7                              | 99.8      | 101.3     | 96.0    | 77.5          | 83.5      | 74.8      | 40.8    |
| Daunorubicin-HCl                    | 95.3                              | 97.5      | 97.4      | 88.4    | 39.6          | -21.1     | -57.9     | -7.6    |
| Clindamycin Palmitate-HCl           | 95.0                              | 95.1      | 96.6      | 99.3    | 77.5          | 76.7      | 37.4      | -6.1    |
| Gemcitabine-HCl                     | 98.4                              | 99.0      | 98.7      | 100.0   | 79.8          | 56.7      | 24.7      | 3.8     |
| Acyclovir (Acycloguanosine) Zovirax | 95.2                              | 95.2      | 83.1      | 86.2    | 34.8          | 21.5      | -5.1      | 2.3     |
| Allopurinol                         | 7.9                               | 7.0       | 14.1      | 11.9    | 89.4          | 85.1      | 37.1      | -11.7   |
| Cefotaxime Acid                     | 96.8                              | 96.5      | 91.6      | 94.7    | 35.4          | 40.6      | 50.5      | 4.7     |
| Ciprofloxacin                       | 94.2                              | 98.0      | 98.2      | 94.6    | 57.6          | 56.0      | 3.4       | -10.6   |
| Doxycycline Monohydrate             | 96.5                              | 98.8      | 99.5      | 97.9    | 78.6          | 78.6      | 19.9      | -6.2    |
| Fluorouracil (5-Fluorouracil)       | 96.4                              | 98.0      | 96.5      | 97.3    | 64.6          | 63.8      | 29.3      | 0.0     |
| Amitriptyline-HCl                   | 7.9                               | 4.9       | 17.8      | 13.5    | 38.4          | 26.1      | -29.9     | -7.8    |
| Floxuridine                         | 96.5                              | 98.5      | 98.5      | 98.2    | 64.4          | 57.0      | 5.6       | 3.8     |
| Gatifloxacin                        | 96.9                              | 98.8      | 96.5      | 96.6    | 75.9          | 71.2      | 58.0      | 20.8    |
| Levofloxacin-HCl                    | 89.1                              | 94.1      | 95.4      | 94.3    | 69.3          | 63.4      | 60.3      | 26.2    |
| Minocycline                         | 96.1                              | 96.7      | 98.6      | 95.7    | 73.3          | 85.1      | 51.9      | -10.7   |
| Norfloxacin                         | 79.2                              | 50.2      | 62.2      | 59.6    | 76.2          | 66.1      | 21.0      | -1.7    |
| Ofloxacin                           | 91.9                              | 95.2      | 98.1      | 98.3    | 63.1          | 44.3      | 34.2      | -2.9    |
| Oxiconazole Nitrate                 | 97.8                              | 96.6      | 94.5      | 95.9    | 24.2          | -44.6     | -18.6     | -7.5    |
| Oxacillin sodium salt monohydrate   | 98.2                              | 97.8      | 96.6      | 96.4    | 62.4          | 17.6      | 49.7      | 8.0     |
| Penicillin V Potassium              | 96.4                              | 98.8      | 99.8      | 95.6    | 82.1          | 71.1      | 77.8      | 12.8    |

|                                      |      |       |       |       |      |       |       |       |
|--------------------------------------|------|-------|-------|-------|------|-------|-------|-------|
| Piperacillin                         | 98.1 | 98.8  | 100.6 | 101.3 | 77.0 | 60.5  | 70.1  | 32.8  |
| Tobramycin                           | 96.5 | 96.8  | 92.4  | 94.6  | 54.1 | 38.7  | 5.6   | 6.1   |
| Trimethoprim                         | 97.9 | 95.9  | 93.5  | 95.6  | 20.3 | 33.8  | -11.8 | -7.8  |
| Amikacin Disulfate                   | 97.9 | 98.8  | 99.6  | 97.3  | 1.5  | -3.9  | 17.1  | 5.6   |
| Cefdinir                             | 96.2 | 97.5  | 98.4  | 96.2  | 86.9 | 82.4  | 87.3  | 52.8  |
| Cefditoren Pivoxil                   | 95.6 | 88.4  | 99.4  | 96.5  | 84.1 | 76.1  | 70.1  | 10.0  |
| Clofazimine                          | 96.4 | 98.6  | 97.9  | 97.8  | 33.3 | -22.1 | -40.7 | -6.1  |
| Cloxacillin-Na                       | 96.7 | 97.6  | 99.9  | 98.2  | 85.0 | 75.4  | 84.9  | 10.2  |
| Dactinomycin<br>(Actinomycin D)      | 98.1 | 97.2  | 96.9  | 94.3  | 90.7 | 80.6  | 54.6  | 12.5  |
| Demeclocycline-HCl                   | 96.9 | 97.4  | 99.5  | 98.8  | 88.6 | 91.4  | 55.6  | -9.1  |
| Dicloxacillin-Na Salt<br>Monohydrate | 97.9 | 98.1  | 100.2 | 98.0  | 79.8 | 43.3  | 65.2  | 17.4  |
| Econazole Nitrate                    | 93.9 | 86.0  | 90.8  | 92.9  | 3.0  | -69.2 | 6.8   | 19.0  |
| Epirubicin-HCl                       | 72.5 | 5.3   | 61.4  | 68.0  | 23.3 | -6.7  | -9.6  | 9.9   |
| Erythromycin                         | 97.9 | 98.1  | 92.8  | 86.3  | 63.3 | 71.8  | 38.8  | 3.3   |
| Fingolimod                           | 98.2 | 98.5  | 100.5 | 96.6  | 35.6 | 13.9  | -14.2 | -8.7  |
| Gemifloxacin                         | 95.9 | 98.9  | 100.9 | 45.2  | 55.5 | 77.4  | 52.8  | -3.9  |
| Hexachlorophene                      | 91.8 | 93.2  | 94.2  | 43.0  | 67.0 | 60.0  | 73.3  | 30.5  |
| Kanamycin Sulfate                    | 96.2 | 96.2  | 92.2  | 94.1  | 35.5 | 14.3  | 5.6   | -7.7  |
| Miconazole                           | 96.4 | 98.4  | 97.9  | 95.0  | 10.0 | -50.5 | 8.6   | 28.6  |
| Mupirocin                            | 96.0 | 98.3  | 100.1 | 98.3  | 84.5 | 87.6  | 59.5  | 10.1  |
| Nafcillin-Na                         | 95.6 | 95.0  | 88.5  | 90.4  | 55.0 | 69.4  | 77.8  | 20.7  |
| Oxytetracycline-HCl                  | 95.7 | 98.4  | 99.9  | 39.1  | 93.6 | 94.7  | 50.6  | -10.8 |
| Paromomycin Sulfate                  | 97.7 | 98.8  | 97.5  | 98.0  | 25.3 | 9.8   | 0.5   | 15.6  |
| Penicillin G Potassium               | 90.9 | 94.9  | 97.0  | 96.9  | 67.2 | 61.9  | 66.2  | 40.7  |
| Rifabutin                            | 95.6 | 99.4  | 99.7  | 100.4 | 83.6 | 81.6  | 60.9  | 17.5  |
| Rifapentine                          | 96.7 | 99.4  | 100.2 | 96.3  | 84.4 | 81.3  | 55.5  | -7.5  |
| Rifaximin                            | 97.2 | 97.2  | 94.3  | 93.0  | 51.3 | 74.8  | 47.5  | -1.6  |
| Sertraline-HCl                       | 17.0 | -13.3 | 9.4   | 19.7  | 5.6  | -15.9 | 7.7   | 15.3  |
| Sulconazole Nitrate                  | 98.6 | 99.0  | 98.9  | 98.7  | 34.8 | -20.4 | -19.1 | -7.5  |
| Telithromycin                        | 96.4 | 97.6  | 99.5  | 96.3  | 93.4 | 93.0  | 37.0  | -9.3  |
| Teniposide                           | 97.1 | 97.7  | 68.4  | 76.1  | 28.3 | 2.3   | 17.9  | 4.1   |
| Vancomycin-HCl                       | 96.4 | 99.5  | 100.7 | 99.3  | 65.0 | 47.5  | 35.2  | -7.3  |

<sup>1</sup> Results are averages from two biofilm replicates.
